# Supplementary material for: Domestic groundwater wells in Appalachia show evidence of low-dose, complex mixtures of legacy pollutants
Source: Royal Society of Chemistry journal article supplement (doi:10.1039/d4em00364k), 2024-01-01
Supplement: d4em00364k1.xlsx [file d4em00364k1.xlsx]

## Sheet: Read Me
Domestic groundwater wells in Appalachia show evidence of low-dose, complex mixtures of legacy pollutants Nicolette A. Bugher(1), Boya Xiong(1,4), Runako I. Gentles(1), Lukas D. Glist(1), Helen G. Siegel(2), Nicholaus P. Johnson(3), Cassandra J. Clark(3), Nicole C. Deziel(3), James E. Saiers(2), Desiree L. Plata(1) (1) Massachusetts Institute of Technology, Department of Civil and Environmental E…

## Sheet: Aggregate Data
			chloromethane	vinyl chloride	bromomethane	chloroethane	trichlorofluoromethane	1,1-dichloroethene & trans-1,2-dichloroethene	1,1-dichloroethane	2,2-dichloropropane & cis-1,2-dichloroethene	bromochloromethane	chloroform	1,1,1-trichloroethane	1,1-dichloropropene & carbon tetrachloride	1,2-dichloroethane & Benzene	trichloroethene	1,2-dichloropropane	dibromomethane	bromodichloromethane	cis-1,3-dichloropropene	toluene	trans-1,3-dichloropropene	1,1,2-trichloroethane	1,3-dichloropropane	tetrachloroethene	dibromochloromethane	1,2-dibromoethane (EDB)	chlorobenzene	1,1,1,2-tetrachloroethane	ethylbenzene	p-xylene & m-xylene	o-xylene, styrene & bromoform	1,1,2,2-tetrachloroethane	isopropylbenzene (cumene) & n-propylbenzene	bromobenzene	1,2,3-trichloropropane	1,3,5-trimethylbenzene	2-chlorotoluene	4-chlorotoluene	tert-butylbenzene	1,2,4-trimethylbenzene	sec-butylbenzene	1,3-dichlorobenzene	p-isopropyltoluene	1,4-dichlorobenzene	n-butylbenzene & 1,2-dichlorobenzene	1,2-dibromo-3-chloropropane	1,2,4-trichlorobenzene	hexachlorobutadiene
		LOD (ug/L)	0.004	4e-05	0.001	0.003	0.002	0.003	0.01	0.002	0.02	0.006	0.01	0.02	0.0004	0.008	0.002	0.006	0.02	1	0.0001	0.005	0.08	0.007	0.01	0.06	0.05	0.001	0.006	0.002	0.001	0.002	0.09	0.006	0.009	0.04	0.008	0.05	0.002	0.004	0.005	0.05	0.05	0.01	0.004	0.0004	0.1	0.09	0.02
			chloromethane	vinyl chloride	bromomethane	chloroethane	trichlorofluoromethane	1,1-dichloroethene & trans-1,2-dichloroethene	1,1-dichloroethane	2,2-dichloropropane & cis-1,2-dichloroethene	bromochloromethane	chloroform	1,1,1-trichloroethane	1,1-dichloropropene & carbon tetrachloride	1,2-dichloroethane & Benzene	trichloroethene	1,2-dichloropropane	dibromomethane	bromodichloromethane	cis-1,3-dichloropropene	toluene	trans-1,3-dichloropropene	1,1,2-trichloroethane	1,3-dichloropropane	tetrachloroethene	dibromochloromethane	1,2-dibromoethane (EDB)	chlorobenzene	1,1,1,2-tetrachloroethane	ethylbenzene	p-xylene & m-xylene	o-xylene, styrene & bromoform	1,1,2,2-tetrachloroethane	isopropylbenzene (cumene) & n-propylbenzene	bromobenzene	1,2,3-trichloropropane	1,3,5-trimethylbenzene	2-chlorotoluene	4-chlorotoluene	tert-butylbenzene	1,2,4-trimethylbenzene	sec-butylbenzene	1,3-dichlorobenzene	p-isopropyltoluene	1,4-dichlorobenzene	n-butylbenzene & 1,2-dichlorobenzene	1,2-dibromo-3-chloropropane	1,2,4-trichlorobenzene	hexachlorobutadiene
	WV	Detection Count	56	56	21	5	5	19	8	35	20	7	0	1	3	1	10	0	0	0	6	8	0	1	0	1	1	2	1	2	5	1	16	6	1	2	4	0	2	5	5	0	2	0	1	0	7	0	0
		% Detection	100	100	37.5	8.92857	8.92857	33.9286	14.2857	62.5	35.7143	12.5	0	1.78571	5.35714	1.78571	17.8571	0	0	0	10.7143	14.2857	0	1.78571	0	1.78571	1.78571	3.57143	1.78571	3.57143	8.92857	1.78571	28.5714	10.7143	1.78571	3.57143	7.14286	0	3.57143	8.92857	8.92857	0	3.57143	0	1.78571	0	12.5	0	0
	OH	Detection Count	12	93	109	9	9	22	3	6	75	35	6	7	39	4	27	3	10	1	33	5	0	5	3	9	2	5	2	13	21	13	1	1	2	1	0	0	3	1	7	0	0	2	2	1	2	0	3
		% Detection	7.40741	57.4074	67.284	5.55556	5.55556	13.5802	1.85185	3.7037	46.2963	21.6049	3.7037	4.32099	24.0741	2.46914	16.6667	1.85185	6.17284	0.617284	20.3704	3.08642	0	3.08642	1.85185	5.55556	1.23457	3.08642	1.23457	8.02469	12.963	8.02469	0.617284	0.617284	1.23457	0.617284	0	0	1.85185	0.617284	4.32099	0	0	1.23457	1.23457	0.617284	1.23457	0	1.85185
	PA	Detection Count	3	23	50	1	2	27	2	4	86	68	5	0	62	67	15	40	0	0	57	2	0	2	1	2	0	1	0	2	21	5	0	0	0	0	0	0	1	0	2	0	2	6	1	3	0	0	4
		% Detection	3.37079	25.8427	56.1798	1.1236	2.24719	30.3371	2.24719	4.49438	96.6292	76.4045	5.61798	0	69.6629	75.2809	16.8539	44.9438	0	0	64.0449	2.24719	0	2.24719	1.1236	2.24719	0	1.1236	0	2.24719	23.5955	5.61798	0	0	0	0	0	0	1.1236	0	2.24719	0	2.24719	6.74157	1.1236	3.37079	0	0	4.49438
	Total	Detection Count	71	172	180	15	16	68	13	45	181	110	11	8	104	72	52	43	10	1	96	15	0	8	4	12	3	8	3	17	47	19	17	7	3	3	4	0	6	6	14	0	4	8	4	4	9	0	7
		% Detection	23.127	56.0261	58.6319	4.88599	5.21173	22.1498	4.23453	14.658	58.9577	35.8306	3.58306	2.60586	33.8762	23.4528	16.9381	14.0065	3.25733	0.325733	31.2704	4.88599	0	2.60586	1.30293	3.90879	0.977199	2.60586	0.977199	5.53746	15.3094	6.18893	5.53746	2.28013	0.977199	0.977199	1.30293	0	1.9544	1.9544	4.56026	0	1.30293	2.60586	1.30293	1.30293	2.9316	0	2.28013
			chloromethane	vinyl chloride	bromomethane	chloroethane	trichlorofluoromethane	1,1-dichloroethene & trans-1,2-dichloroethene	1,1-dichloroethane	2,2-dichloropropane & cis-1,2-dichloroethene	bromochloromethane	chloroform	1,1,1-trichloroethane	1,1-dichloropropene & carbon tetrachloride	1,2-dichloroethane & Benzene	trichloroethene	1,2-dichloropropane	dibromomethane	bromodichloromethane	cis-1,3-dichloropropene	toluene	trans-1,3-dichloropropene	1,1,2-trichloroethane	1,3-dichloropropane	tetrachloroethene	dibromochloromethane	1,2-dibromoethane (EDB)	chlorobenzene	1,1,1,2-tetrachloroethane	ethylbenzene	p-xylene & m-xylene	o-xylene, styrene & bromoform	1,1,2,2-tetrachloroethane	isopropylbenzene (cumene) & n-propylbenzene	bromobenzene	1,2,3-trichloropropane	1,3,5-trimethylbenzene	2-chlorotoluene	4-chlorotoluene	tert-butylbenzene	1,2,4-trimethylbenzene	sec-butylbenzene	1,3-dichlorobenzene	p-isopropyltoluene	1,4-dichlorobenzene	n-butylbenzene & 1,2-dichlorobenzene	1,2-dibromo-3-chloropropane	1,2,4-trichlorobenzene	hexachlorobutadiene
	WV	Min (ug/L)	0.00842922	0.00459281	0	0	0	0	0	0	0	0	0	0	0	0	0	0	0	0	0	0	0	0	0	0	0	0	0	0	0	0	0	0	0	0	0	0	0	0	0	0	0	0	0	0	0	0	0
		Max (ug/L)	65.3583	1.84297	0.261798	0.0368347	0.833992	2.49247	0.180275	0.759576	4.94719	12.5951	0	0.0153865	2.61835	0.00952862	0.0863654	0	0	0	0.0453971	0.137791	0	2.68007	0	0.387388	0.356244	3.3744	0.313098	0.0175997	0.405161	0.291706	1.7984	0.064173	0.0215958	0.0563723	0.0332604	0	0.0343399	0.0153263	0.0577295	0	0.0704422	0	0.0152193	0	0.58348	0	0
		Median (ug/L)	0.0588673	0.0652279	0	0	0	0	0	0.0482161	0	0	0	0	0	0	0	0	0	0	0	0	0	0	0	0	0	0	0	0	0	0	0	0	0	0	0	0	0	0	0	0	0	0	0	0	0	0	0
		Mean (ug/L)	1.4286	0.126545	0.0392817	0.00133721	0.0229041	0.123611	0.0161573	0.128357	0.3914	0.276624	0	0.000274759	0.0482339	0.000170154	0.00721601	0	0	0	0.00198763	0.0102443	0	0.0478584	0	0.00691763	0.0063615	0.0606397	0.00559103	0.000399884	0.00789927	0.00520904	0.150219	0.00425307	0.000385639	0.00180919	0.00143526	0	0.000645207	0.000879216	0.00152021	0	0.00219449	0	0.000271773	0	0.0413349	0	0
		Standard Dev. (ug/L)	8.76914	0.25193	0.0641655	0.0056072	0.119756	0.371547	0.0447721	0.187904	0.831244	1.68523	0	0.00205611	0.34984	0.00127331	0.0178552	0	0	0	0.00730137	0.0295676	0	0.35814	0	0.0517668	0.0476051	0.45088	0.0418395	0.00242628	0.0541642	0.0389809	0.341582	0.0141944	0.00288586	0.0095483	0.00575288	0	0.00459076	0.00313621	0.00787221	0	0.0116333	0	0.00203376	0	0.127841	0	0
	OH	Min (ug/L)	0	0	0	0	0	0	0	0	0	0	0	0	0	0	0	0	0	0	0	0	0	0	0	0	0	0	0	0	0	0	0	0	0	0	0	0	0	0	0	0	0	0	0	0	0	0	0
		Max (ug/L)	1.44634	0.647092	0.280527	0.242788	0.201688	0.597845	0.0667561	0.828738	0.943181	98.4525	0.492209	0.441583	2.732	0.386237	0.0812931	1.27758	10.1505	1.17121	2.73579	1.41234	0	0.318707	0.0543068	1.786	0.143914	0.57071	0.297901	0.130391	0.725299	0.1365	0.294382	0.0675974	0.375258	0.208199	0	0	0.0131631	0.00987977	0.189089	0	0	0.0999444	0.0518408	0.000444644	0.554817	0	0.0699586
		Median (ug/L)	0	0.00274371	0.0118826	0	0	0	0	0	0	0	0	0	0	0	0	0	0	0	0	0	0	0	0	0	0	0	0	0	0	0	0	0	0	0	0	0	0	0	0	0	0	0	0	0	0	0	0
		Mean (ug/L)	0.0117232	0.0331573	0.027946	0.00519181	0.00312074	0.0114088	0.000888538	0.0100158	0.0566865	1.40701	0.00737942	0.00549354	0.0247336	0.00532511	0.00354948	0.00899276	0.133435	0.00722967	0.0261107	0.0128632	0	0.0029908	0.000532188	0.0396694	0.00121663	0.00436272	0.00187882	0.00201806	0.0132317	0.0021339	0.00181717	0.000417268	0.00237428	0.00128518	0	0	0.000123458	6.09862e-05	0.00239948	0	0	0.00077512	0.000442622	2.74472e-06	0.00483258	0	0.00092599
		Standard Dev. (ug/L)	0.114414	0.0936359	0.042312	0.0258853	0.0195239	0.060818	0.0068135	0.0758227	0.104441	9.12528	0.0492919	0.0397815	0.21822	0.0381939	0.0122748	0.101205	0.880433	0.0920187	0.217553	0.115219	0	0.0269896	0.00465488	0.220923	0.0120299	0.045638	0.0234076	0.0115388	0.0658427	0.0120599	0.0231288	0.00531095	0.0294877	0.0163577	0	0	0.00110997	0.000776228	0.0162483	0	0	0.00809424	0.0043527	3.49346e-05	0.0470265	0	0.00748306
	PA	Min (ug/L)	0	0	0	0	0	0	0	0	0	0	0	0	0	0	0	0	0	0	0	0	0	0	0	0	0	0	0	0	0	0	0	0	0	0	0	0	0	0	0	0	0	0	0	0	0	0	0
		Max (ug/L)	0.0887014	0.184049	0.285487	0.157337	0.0290766	0.17202	0.0427562	0.0828556	1.17876	0.627062	0.128041	0	0.102227	4.11493	0.102068	2.07773	0	0	0.260682	0.0280374	0	2.49029	0.0291062	5.41662	0	0.046664	0	0.0793416	0.199313	0.07108	0	0	0	0	0	0	0.0243446	0	0.132129	0	0.740938	0.215831	0.00366418	0.0563151	0	0	0.128433
		Median (ug/L)	0	0	0.0144756	0	0	0	0	0	0.523582	0.089654	0	0	0.01989	0.0350556	0	0	0	0	0.0118088	0	0	0	0	0	0	0	0	0	0	0	0	0	0	0	0	0	0	0	0	0	0	0	0	0	0	0	0
		Mean (ug/L)	0.0025109	0.0111519	0.0351409	0.00176783	0.000592991	0.0143084	0.00060777	0.00118428	0.529794	0.137077	0.00432313	0	0.0257719	0.125615	0.00386228	0.0896154	0	0	0.0264247	0.000373827	0	0.0328718	0.000327036	0.063618	0	0.000524315	0	0.00136992	0.0162909	0.00216168	0	0	0	0	0	0	0.000273535	0	0.00161061	0	0.0116627	0.00497915	4.11705e-05	0.00149298	0	0	0.00425751
		Standard Dev. (ug/L)	0.0138862	0.0297393	0.0504574	0.0166777	0.00395403	0.0334974	0.0046755	0.0089437	0.210448	0.151245	0.0200013	0	0.0263735	0.581171	0.0127088	0.23627	0	0	0.0447695	0.00301708	0	0.267455	0.00308525	0.574454	0	0.00494638	0	0.00949952	0.0442119	0.0109154	0	0	0	0	0	0	0.00258052	0	0.0140426	0	0.0842831	0.0267134	0.000388402	0.00840512	0	0	0.0201816
			Bromide	Chloride
		LOD (ug/L)	0.008	0.55
			Bromide	Chloride
	WV	Detection Count	42	56
		% Detection	75	100
	OH	Detection Count	85	160
		% Detection	52.795	99.3789
	PA	Detection Count	32	93
		% Detection	34.4086	100
	Total	Detection Count	159	309
		% Detection	51.2903	99.6774
			Bromide	Chloride
	WV	Min (ug/L)	0	1068
		Max (ug/L)	1366	210771
		Median (ug/L)	50	11251.5
		Mean (ug/L)	136.75	34011.9
		Standard Dev. (ug/L)	278.557	52036.8
	OH	Min (ug/L)	0	0
		Max (ug/L)	5634	288903
		Median (ug/L)	27	6758
		Mean (ug/L)	127.957	22486
		Standard Dev. (ug/L)	559.218	42468.9
	PA	Min (ug/L)	0	685.22
		Max (ug/L)	5813.66	384746
		Median (ug/L)	0	5669.28
		Mean (ug/L)	244.131	25101.3
		Standard Dev. (ug/L)	885.631	60204.4
[truncated: 2 more columns]

## Sheet: Field Blank Data
Note: Reported concentrations in ug/L
Date Collected	Sample	chloromethane	vinyl chloride	bromomethane	chloroethane	trichlorofluoromethane	1,1-dichloroethene & trans-1,2-dichloroethene	dichloromethane	1,1-dichloroethane	2,2-dichloropropane & cis-1,2-dichloroethene	bromochloromethane	chloroform	1,1,1-trichloroethane	1,1-dichloropropene & carbon tetrachloride	1,2-dichloroethane & Benzene	trichloroethene	1,2-dichloropropane	dibromomethane	bromodichloromethane	cis-1,3-dichloropropene	toluene	trans-1,3-dichloropropene	1,1,2-trichloroethane	1,3-dichloropropane	tetrachloroethene	dibromochloromethane	1,2-dibromoethane (EDB)	chlorobenzene	1,1,1,2-tetrachloroethane	ethylbenzene	p-xylene & m-xylene	o-xylene, styrene & bromoform	1,1,2,2-tetrachloroethane	isopropylbenzene (cumene) & n-propylbenzene	bromobenzene	1,2,3-trichloropropane	1,3,5-trimethylbenzene	2-chlorotoluene	4-chlorotoluene	tert-butylbenzene	1,2,4-trimethylbenzene	sec-butylbenzene	1,3-dichlorobenzene	p-isopropyltoluene	1,4-dichlorobenzene	n-butylbenzene & 1,2-dichlorobenzene	1,2-dibromo-3-chloropropane	1,2,4-trichlorobenzene	hexachlorobutadiene
2020-10-04	WV_FB_100420	0.00463287	0	0	0	0	0	1.50786	0	0	0	0	0	0	0	0	0	0	0	0	0	0	0	0	0	0	0	0	0	0	0	0	0	0	0	0	0	0	0	0.0648121	0	0	0	0	0	0	0	0	0
2020-10-05	WV_FB_100520	0.0351943	0	0	0	0	0	3.11789	0	0.158913	0	0	0	0	0	0	0	0	0	0	0.0906559	0	0	0	0	0	0	0	0	0	0	0	0	0	0	0	0	0	0	0	0	0	0	0	0	0	0	0	0
2020-10-06	WV_FB_100620	0	0	0	0	0	0	1.66545	0	0	0	0	0	0	0	0	0	0	0	0	0	0	0	0	0	0	0	0	0	0	0	0	0	0	0	0	0	0	0	0	0	0	0	0	0	0	0	0	0
2020-10-07	WV_FB_100720	0.0101713	0	0	0	0	0	1.62498	0	0	0	0	0	0	0	0	0	0	0	0	0	0	0	0	0	0	0	0	0	0	0	0	0	0	0	0	0	0	0	0	0	0	0	0	0	0	0	0	0
2020-10-08	WV_FB_100820	0.0390551	0.020085	0	0	0	0	1.46965	0	0	0	0	0	0	0	0	0	0	0	0	0	0	0	0	0	0	0	0	0	0	0	0	0	0	0	0	0	0	0	0	0	0	0	0	0	0	0	0	0
2020-10-09	WV_FB_100920	0.0255153	0.0098864	0	0	0	0	5.24975	0	0.156019	0	0	0	0	0	0	0	0	0	0	0	0	0	0	0	0	0	0	0	0	0	0	0	0	0	0	0	0	0	0	0	0	0	0	0	0	0	0	0
2020-10-10	WV_FB_101020	0.279053	0	0	0	0	0	8.38719	0	0	0	0	0	0	0	0	0	0	0	0	0	0	0	0	0	0	0	0	0	0	0	0	0	0	0	0	0	0	0	0	0	0	0	0	0	0	0	0	0
2020-10-11	WV_FB_101120	0.0819514	0.00324531	0.00327303	0.0689889	0	0	1.85671	0	0.115299	0	0	0	0	0.082707	0	0	0	0	0	0	0	0	0	0	0	0	0	0	0	0	0	0	0	0	0	0	0	0	0	0	0	0	0	0	0	0	0	0
2020-10-15	WV_FB_101520	0.0335114	0.0110092	0	0	0	0	4.43434	0	0.161578	0	0	0	0	0	0	0	0	0	0	0	0	0	0	0	0	0	0	0	0	0	0	0	0	0	0	0	0	0	0	0	0	0	0	0	0	0	0	0
2020-10-16	WV_FB_101620	0.146272	0.00979387	0	0	0	0	3.47727	0.339573	1.48109	1.10872	0	0	0	0	0	0.0920479	0	0	0	0	0	0	0	0	0	0	0	0	0	0	0	0.932658	0	0	0	0	0	0	0	0	0	0	0	0	0	0	0	0
2020-10-18	WV_FB_101820	0.816541	0.229951	0	0	0	0	7.06454	0	0.716491	0	0	0	0	0	0	0	0	0	0	0	0	0	3.81699	0	0.236169	0	0	0	0	0	0	0	0	0	0	0	0	0	0	0	0	0	0	0	0	0	0	0
2020-10-17	WV_FB_101720	0.032829	0	0	0	0	0	2.34505	0	0	0	0	0	0	0	0	0	0	0	0	0	0	0	0	0	0	0	0	0	0	0	0	0	0	0	0	0	0	0	0	0	0	0	0	0	0	0	0	0
2020-10-12	WV_FB_101220	0.123332	0	0	0	0	0	7.90595	0	0	0	0	0	0	0	0	0.095498	0	0	0	0	0	0	0	0	0	0	0	0	0	0	0	1.31801	0	0	0	0	0	0	0	0	0	0	0	0	0	0	0	0
2020-10-13	WV_FB_101320	0.0421852	0	0	0	0	0	3.94505	0	0	0	0	0	0	0	0	0	0	0	0	0	0	0	0	0	0	0	0	0	0	0	0	0	0	0	0	0	0	0	0	0	0	0	0	0	0	0	0	0
2020-10-14	WV_FB_101420	0.249641	0	0	0	0	0	18.4946	0	0	0	0	0	0	0	0	0	0	0	0	0	0	0	0	0	0	0	0	0	0	0	0	0	0.522904	0	0	0.503186	0	0	0	0	0	0	0	0	0	0	0	0
2020-10-25	WV_FB_102520	0.0557845	0	0	0	0	0	3.55822	0	0	0.358002	0	0	0	0	0	0	0	0	0	0	0	0	0	0	0	0	0	0	0	0	0	0	0	0	0	0	0	0	0	0	0	0	0	0	0	0	0	0
2020-10-21	WV_FB_102120	0.104024	0.0331962	0	0	0	0	5.5233	0	0	0	0	0	0	0	0	0	0	0	0	0	0	0	0	0	0	0	0	0	0	0	0	0	0	0	0	0	0	0	0	0	0	0	0	0	0	0	0	0
2020-10-20	WV_FB_102020	0.557171	0	0	0	0	0	32.7737	0	0	1.79708	0	0	0	0	0	0.428648	0	0	0	0	0.364327	0	0	0	0	0	0	0	0	0	0	0.345415	0	0	0	0	0	0	0	0	0	0	0	0	0	0	0	0
2020-10-19	WV_FB_101920	0.862027	0	0	0	0	0	19.7229	0	0	0	0	0	0	0	0	0.526117	0	0	0	0	0.265649	0	0	0	0	0	0	0	0	0	0	0.672309	0	0	0	0	0	0	0	0	0	0	0	0	0	0	0	0
2020-10-24	WV_FB_102420	0.0487854	0	0	0	0	0	2.51493	0	0	0	0	0	0	0	0	0	0	0	0	0	0	0	0	0	0	0	0	0	0	0	0	0	0.169343	0	0	0	0	0	0	0	0	0	0	0	0	0	0	0
2020-10-25	WV_FB_102520	0.0510641	0	0	0	0	0	1.70839	0	0	0	0	0	0	0	0	0	0	0	0	0	0	0	0	0	0	0	0	0	0	0	0	0	0	0	0	0	0	0	0	0	0	0	0	0	0	0	0	0
2020-10-22	WV_FB_102220	0.0458474	0.0194077	0	0	0	0	1.65898	0	0	0	0	0	0	0	0	0	0	0	0	0	0	0	0	0	0	0	0	0	0	0	0	0	0	0	0	0	0	0	0	0	0	0	0	0	0	0	0	0
2019-06-20	OH_FB_062019_1	0	0.0826635	0.357222	0	0.034772	0	13.5175	0	0	0.112959	0	0	0	0	0	0.0234541	0	0	0	0	0	0	0	0	0	0	0	0	0	0	0	0	0	0	0	0	0	0	0	0	0	0	0	0	0	0	0	0
2019-06-20	OH_FB_062019_2	0	0.0102694	0.146049	0	0	0	6.45224	0	0	0.151293	0	0	0	0	0	0	0	0	0	0	0	0	0	0	0	0	0	0	0	0	0	0	0	0	0	0	0	0	0	0	0	0	0	0	0	0	0	0
2019-07-01	OH_FB_070119	0	0	0.0564304	0	0	0	2.30354	0	0	0	0	0	0	0	0	0	0	0	0	0.0122104	0	0	0	0	0	0	0	0	0	0	0	0	0	0	0	0	0	0	0	0	0	0	0	0	0	0	0	0
2019-07-02	OH_FB_070219	0.00807606	0	0.0526164	0	0	0	3.1758	0	0	0	0	0	0	0	0	0	0	0	0	0.00554166	0	0	0	0	0	0	0	0	0	0	0	0	0	0	0	0	0	0	0	0	0	0	0	0	0	0	0	0
2019-07-03	OH_FB_070319	0	0.0650997	0.164196	0	0	0	12.1928	0	0	0.149267	0	0	0	0	0	0.018661	0	0	0	0.0278968	0	0	0	0	0	0	0	0	0	0	0	0	0	0	0	0	0	0	0	0	0	0	0	0	0	0	0	0
2019-07-04	OH_FB_070419	0	0.0348755	0	0	0	0	3.69799	0	0	0	0	0	0	0	0	0	0	0	0	0	0	0	0	0	0	0	0	0	0	0	0	0	0	0	0	0	0	0	0	0	0	0	0	0	0	0	0	0
2019-07-05	OH_FB_070519	0	0	0.049256	0	0	0	5.60713	0	0	0.0606667	0	0	0	0	0	0.0185851	0	0	0	0.0149495	0	0	0	0	0	0	0	0	0	0	0	0	0	0	0	0	0	0	0	0	0	0	0	0	0	0	0	0
2019-07-06	OH_FB_070619	0	0	0.116149	0	0	0	7.91121	0	0	0	0	0	0	0	0	0	0	0	0	0.0122375	0	0	0	0	0	0	0	0	0	0	0	0	0	0	0	0	0	0	0	0	0	0	0	0	0	0	0	0
2019-07-08	OH_FB_070819	0	0	0	0	0	0	1.9036	0	0	0	0	0	0	0	0	0	0	0	0	0	0	0	0	0	0	0	0	0	0	0	0	0	0	0	0	0	0	0	0	0	0	0	0	0	0	0	0	0
2019-07-08	OH_FB_070819	0	0	0	0	0	0	1.49122	0	0	0	0	0	0	0	0	0	0	0	0	0.0116644	0	0	0	0	0	0	0	0	0	0	0	0	0	0	0	0	0	0	0	0	0	0	0	0	0	0	0	0
2019-07-09	OH_FB_070919	0	0.00162069	0	0	0	0	1.56359	0	0	0	0	0	0	0	0	0	0	0	0	0.022853	0	0	0	0	0	0	0	0	0	0	0	0	0	0	0	0	0	0	0	0	0	0	0	0	0	0	0	0
2019-07-09	OH_FB_070919	0	0.0198477	0	0	0	0	1.13507	0	0	0	0	0	0	0	0	0	0	0	0	0.0965476	0	0	0	0	0	0	0	0	0	0	0	0	0	0	0	0	0	0	0	0	0	0	0	0	0	0	0	0
2019-07-09	OH_FB_070919	0	0.00778197	0	0	0	0	0.818867	0	0	0.134451	0	0	0	0	0	0	0	0	0	0.0729217	0	0	0	0	0	0	0	0	0	0	0	0	0	0	0	0	0	0	0	0	0	0	0	0	0	0	0	0
2019-07-10	OH_FB_071019	0	0	0	0	0	0	0	0	0	0	0	0	0	0	0	0	0	0	0	0.0659651	0	0	0	0	0	0	0	0	0	0.114145	0	0	0	0	0	0	0	0	0	0	0	0	0	0	0	0	0	0
2019-07-10	OH_FB_071019	0	0	0.0215531	0	0	0	0	0	0	0.0541519	0	0	0	0.047084	0	0	0	0	0	0.186543	0	0	0	0	0	0	0	0	0.0479725	0.175552	0.0330565	0	0	0	0	0	0	0	0	0	0	0	0	0	0	0	0	0
2019-07-10	OH_FB_071019	0	0	0.0543025	0	0	0.0164881	0	0	0	0.280009	0	0	0	0.00871393	0	0.0211665	0	0	0	0.0889537	0	0	0	0	0	0	0	0.33686	0.0431324	0.213636	0.0346674	0	0	0	0	0	0	0	0	0	0	0	0	0	0	0	0	0
2019-07-12	OH_FB_071219	0	0	0.0762928	0	0	0	0	0	0	0	0	0	0	0	0	0	0	0	0	0	0	0	0	0	0	0	0	0	0	0	0	0	0	0	0	0	0	0	0	0	0	0	0	0	0	0	0	0
2019-07-12	OH_FB_071219	0	0	0.00581195	0	0	0	0	0	0	0	0	0	0	0	0	0	0	0	0	0	0	0	0	0	0	0	0	0	0	0	0	0	0	0	0	0	0	0	0	0	0	0	0	0	0	0	0	0
2019-07-12	OH_FB_071219	0	0	0.0110994	0	0	0	8.13298	0	0	0.335459	0	0	0	0	0	0.00550081	0	0	0	0	0	0	0	0	0	0	0	0	0	0	0	0	0	0	0	0	0	0	0	0	0	0	0	0	0	0	0	0
2019-07-14	OH_FB_071419	0	0	0	0	0	0	0	0	0	0	0	0	0	0	0	0	0	0	0	0.00953144	0	0	0	0	0	0	0	0	0.012107	0.0362019	0.00372698	0	0	0	0	0	0	0	0	0	0	0	0	0	0	0	0	0
2019-07-14	OH_FB_071419	0	0	0	0	0	0	0	0	0	0.100811	0	0	0	0	0	0	0	0	0	0.0115186	0	0	0	0	0	0	0	0.194228	0.0113208	0.0409052	0.00356254	0	0	0	0	0	0	0	0	0	0	0	0	0	0	0	0	0
2019-07-14	OH_FB_071419	0	0	0	0	0	0	8.23591	0	0	0.280927	0	0	0	0	0	0.0360358	0	0	0	0	0	0	0	0	0	0	0	0	0	0	0	0	0	0	0	0	0	0	0	0	0	0	0	0	0	0	0	0
2019-07-19	OH_FB_071919	0	0.0478493	0	0	0	7.98963	0	0	0.181652	0	0	0	0	0	0.0252191	0	0	0	0	0	0	0	0	0	0	0	0	0	0	0	0	0	0	0	0	0	0	0	0	0	0	0	0	0	0	0	0	0
2019-07-19	OH_FB_071919	0	0	0.0385172	0	0	0	0	0	0	0.192468	0	0	0	0	0	0.0263089	0	0	0	0.0085326	0	0	0	0	0	0	0	0.160657	0.0140895	0.0368012	0.00876149	0	0	0	0	0	0	0	0	0	0	0	0	0	0	0	0	0
2019-07-19	OH_FB_071919	0	0.00506619	0.0398737	0	0	0	0.505281	0	0	0	0	0	0	0	0	0	0	0	0	0.00083252	0	0	0	0	0	0	0	0	0	0	0	0	0	0	0	0	0	0	0	0	0	0	0	0	0	0	0	0
2019-07-19	OH_FB_071919	0	0.00627603	0.0476039	0	0	0	6.31022	0	0	0	0	0	0	0	0	0	0	0	0	0	0	0	0	0	0	0	0	0	0	0	0	0	0	0	0	0	0	0	0	0	0	0	0	0	0	0	0	0
2019-07-26	OH_FB_072619	0	0	0.06466	0	0	0	6.67847	0	0	0.332314	0	0	0	0	0	0.00958368	0	0	0	0	0	0	0	0	0	0	0	0	0	0	0	0	0	0	0	0	0	0	0	0	0	0	0	0	0	0	0	0
2019-07-26	OH_FB_072619	0	0	0	0	0	0	0.0836019	0	0	0.496891	0	0	0	0	0	0.0155723	0	0	0	0	0	0	0	0	0	0	0	0	0	0	0	0	0	0	0	0	0	0	0	0	0	0	0	0	0	0	0	0
2019-07-26	OH_FB_072619	0	0	0.0736241	0	0	0	0	0	0	0.304619	0	0	0	0	0	0.0052361	0	0	0	0	0	0	0	0	0	0	0	0	0	0	0	0	0	0	0	0	0	0	0	0	0	0	0	0	0	0	0	0
2019-07-29	OH_FB_072919	0	0.080034	0	0	0	0	0	0	0	0	0	0	0	0	0	0	0	0	0	0	0	0	0	0	0	0	0	0	0	0	0	0	0	0	0	0	0	0	0	0	0	0	0	0	0	0	0	0
2019-07-29	OH_FB_072919	0	0	0	0	0	0	0	0	0	0	0	0	0	0	0	0	0	0	0	0	0	0	0	0	0	0	0	0	0	0	0	0	0	0	0	0	0	0	0	0	0	0	0	0	0	0	0	0
2019-07-29	OH_FB_072919	0	0	0	0	0	0	0	0	0	0	0	0	0	0	0	0	0	0	0	0	0	0	0	0	0	0	0	0	0	0	0	0	0	0	0	0	0	0	0	0	0	0	0	0	0	0	0	0
2019-07-30	OH_FB_073019	0	0.0273617	0	0	0	0	1.32601	0	0	0.356305	0	0	0	0	0	0.0281444	0	0	0	0.00262989	0	0	0	0	0	0	0	0	0	0	0	0	0	0	0	0	0	0	0	0	0	0	0	0	0	0	0	0
2019-07-31	OH_FB_073119	0	0.00739495	0	0	0	0	0.615475	0	0	0.182021	0	0	0	0	0	0	0	0	0	0.00346207	0	0	0	0	0	0	0	0	0	0	0	0	0	0	0	0	0	0	0	0	0	0	0	0	0	0	0	0
2019-08-01	OH_FB_080119	0	0	0.105306	0	0	0	0.255526	0	0	0.454741	0	0	0	0	0	0	0	0	0	0	0	0	0	0	0	0	0	0	0	0	0	0	0	0	0	0	0	0	0	0	0	0	0	0	0	0	0	0
2019-08-06	OH_FB_080619	0	0.0661468	0.000863698	0	0	0	0	0	0	0.251856	0	0	0	0	0	0	0	0	0	0.0751019	0	0	0	0	0	0	0	0	0	0	0	0	0	0	0	0	0	0	0	0	0	0	0	0	0	0	0	0
2019-08-06	OH_FB_080619	0	0.0676767	0.00599063	0	0	0	0	0	0	0.338832	0	0	0	0	0	0	0	0	0	0	0	0	0	0	0	0	0	0	0	0	0	0	0	0	0	0	0	0	0	0	0	0	0	0	0	0	0	0
2019-08-07	OH_FB_080719	0	0.0043013	0	0	0	0	0	0	0	0	0.39358	0	0	0	0	0	0	0	0	0	0	0	0	0.0232482	0	0	0	0	0	0	0	0	0	0	0	0	0	0	0	0	0	0	0	0	0	0	0	0
2019-08-07	OH_FB_080719	0	0	0	0	0	0	0	0	0	0	0	0.0529182	0	0	0.0970446	0	0	0	0	0	0	0	0	0	0.012114	0	0	0	0	0	0	0	0	0	0	0	0	0	0	0	0	0	0	0	0	0	0	0
2019-08-08	OH_FB_080819	0	0.0213767	0	0	0	0	0.324505	0	0	0.340312	0	0	0	0	0	0	0	0	0	0.0467108	0	0	0	0	0	0	0	0	0	0	0	0	0	0	0	0	0	0	0	0	0	0	0	0	0	0	0	0
2019-08-08	OH_FB_080819	0	0.0056902	0	0	0	0	0.0272589	0	0	0	0	0	0	0.0349437	0	0	0	0	0	0.0533663	0	0	0	0	0	0	0	0	0	0	0	0	0	0	0	0	0	0	0	0	0	0	0.0455297	0	0	0	0	0
2019-08-08	OH_FB_080819	0	0	0.286519	0	0	0	2.44895	0	0	0	0	0	0	0	0	0	0	0	0	0.0390474	0	0	0	0	0	0	0	0.777739	0.0452891	0.234285	0.0462443	0	0	0	0	0	0	0	0	0	0	0	0.0484962	0	0	0	0	0
2019-08-09	OH_FB_080919	0	0.0270519	0	0	0	0	0.469969	0	0	0	0	0	0	0	0	0	0	0	0	0.0315221	0	0	0	0	0	0	0	0.663133	0.0292541	0.138704	0.0354346	0	0	0	0	0	0	0	0	0	0	0	0	0	0	0	0	0
2019-08-09	OH_FB_080919	0	0	0.0605704	0	0	0	0.27902	0	0	0.177162	0	0	0	0	0	0	0	0	0	0	0	0	0	0	0	0	0	0	0	0	0	0	0	0	0	0	0	0	0	0	0	0	0	0	0	0	0	0
2019-08-12	OH_FB_081219	0	0.0371439	0	0	0.081746	0	0	0	0	0	0.708701	0	0	0.223235	0	0	0	0	0	0	0	0	0	0.0135345	0	0	0	0	0	0	0	0	0	0	0	0	0	0	0	0	0	0	0	0	0	0	0	0
2019-08-12	OH_FB_081219	0	0	0	0	0.077938	0	0	0	0	0	0.788359	0	0	0.19874	0	0	0	0	0	0	0	0	0	0.0226401	0	0	0	0	0	0	0	0.32108	0.0246019	0.111425	0.0230521	0	0	0	0	0	0	0	0	0	0	0	0	0
2019-08-12	OH_FB_081219	0	0	0	0	0.0733807	0	0	0	0	0	0.399112	0	0	0.0701927	0.209684	0	0	0	0	0	0	0	0	0	0.0141178	0	0	0	0	0	0	0	0	0	0	0	0	0	0	0	0	0	0	0	0	0	0	0
2019-08-13	OH_FB_081319	0	0.00532356	0.00199013	0	0	0	0.949846	0	0.133876	0	0	0	0	0	0	0	0	0	0	0	0	0	0	0	0	0	0	0.285164	0	0	0	0	0	0	0	0	0	0	0	0	0	0	0	0	0	0	0	0
2019-08-13	OH_FB_081319	0	0	0.00858517	0	0	0	0.886233	0	0.148963	0.15018	0	0	0	0	0	0	0	0	0	0	0	0	0	0	0	0	0	0	0	0	0	0	0	0	0	0	0	0	0	0	0	0	0	0	0	0	0	0
2019-08-13	OH_FB_081319	0	0.0115641	0	0	0	0	0	0	0.198763	0.208102	0	0	0	0	0	0	0	0	0	0	0	0	0	0	0	0	0	0.220587	0	0	0.0372302	0	0	0	0	0	0	0	0	0	0	0	0	0	0	0	0	0
2019-08-14	OH_FB_081419	0	0	0	0	0	0	0	0	0	0.116984	0	0	0	0	0	0	0	0	0	0	0	0	0	0	0	0	0	0.59755	0.0544476	0.168322	0.0357333	0	0	0	0	0	0	0	0	0	0	0	0	0	0	0	0	0
2019-08-14	OH_FB_081419	0	0.0230315	0	0	0	0	0	0	0	0	0	0	0	0	0	0	0	0	0	0	0	0	0	0	0	0	0	0.926312	0.0531763	0	0	0	0	0	0	0	0	0	0	0	0	0	0	0	0	0	0	0
2019-08-14	OH_FB_081419	0	0	0	0	0	0	0.0426008	0	0	0	0	0	0	0	0	0	0	0	0	0	0	0	0	0	0	0	0	0	0	0	0	0	0	0	0	0	0	0	0	0	0	0	0	0	0	0	0	0
2019-08-14	OH_FB_081419	0	0	0	0	0	0	0.116719	0	0	0.111895	0	0	0	0	0	0	0	0	0	0.0389867	0	0	0	0	0	0	0	0.551229	0.0491585	0.143487	0.0336284	0	0	0	0	0	0	0	0	0	0	0	0	0	0	0	0	0
2019-07-11	OH_FB_071119	0	0	0.0300478	0	0	0	0	0	0	0	0	0	0	0	0	0	0	0	0	0	0	0	0	0	0	0	0	0	0	0	0	0	0	0	0	0	0	0	0	0	0	0	0	0	0	0	0	0
2019-07-11	OH_FB_071119	0	5.11357	0	0	0	0	0	0	0	0	0	0	0	0	0	0	0	0	0	0	0	0	0	0	0	0	0	0	0	0	0	0	0	0	0	0	0	0	0	0	0	0	0	0	0	0	0	0
2019-07-11	OH_FB_071119	0	1.73432	0	0	0	0	0	0	0	0	0	0	0	0	0	0	0	0	0	0	0	0	0	0	0	0	0	0	0	0	0	0	0	0	0	0	0	0	0	0	0	0	0	0	0	0	0	0
2019-06-19	OH_FB_061919	0.0477431	0.0502351	0.254916	0	0	0	2.26416	0	0	0	0	0	0	0	0	0	0	0	0	0	0	0	0	0	0	0	0	0	0	0	0	0	0	0	0	0	0	0	0	0	0	0	0	0	0	0	0	0
2019-06-19	OH_FB_061919	0.0592758	0.032638	0.12543	0	0	0	2.0875	0	0	0	0	0	0	0	0	0	0	0	0	0	0	0	0	0	0	0	0	0	0	0	0	0	0	0	0	0	0	0	0	0	0	0	0	0	0	0	0	0
2019-06-27	OH_FB_062719	0	0	0.388908	0	0	0	3.98487	0	0	0	0	0	0	0	0	0	0	0	0	0	0	0	0	0	0	0	0	0	0	0	0	0	0	0	0	0	0	0	0	0	0	0	0	0	0	0	0	0
2019-06-27	OH_FB_062719	0	0	0.198206	0	0	0	4.27777	0	0	0	0	0	0	0	0	0	0	0	0	0	0	0	0	0	0	0	0	0	0	0	0	0	0	0	0	0	0	0	0	0	0	0	0	0	0	0	0	0
2019-06-28	OH_FB_062819	0	0	0	0.262405	0	0	1.62913	0	0	0	0	0	0	0	0	0	0	0	0	0	0	0	0	0	0	0	0	0	0	0	0	0	0	0	0	0	0	0	0	0	0	0	0	0	0	0	0	0
2019-06-28	OH_FB_062819	0	0	0	0	0	0	1.65709	0	0	0	0	0	0	0	0	0	0	0	0	0	0	0	0	0	0	0	0	0	0	0	0	0	0	0	0	0	0	0	0	0	0	0	0	0	0	0	0	0
2019-06-29	OH_FB_062919	0	0.027438	0.0635652	0	0	0	4.90218	0	0	0.111031	0	0	0	0	0	0	0	0	0	0	0	0	0	0	0	0	0	0	0	0	0	0	0	0	0	0	0	0	0	0	0	0	0	0	0	0	0	0
2019-06-29	OH_FB_062919	0	0.112345	0.0197587	0.391802	0	0	2.01246	0	0	0	0	0	0	0	0	0	0	0	0	0	0	0	0	0	0	0	0	0	0	0	0	0	0	0	0	0	0	0	0	0	0	0	0	0	0	0	0	0
2019-06-29	OH_FB_062919	0	0.0305779	0	0.393248	0.000172852	0	2.29917	0	0	0	0	0	0	0	0	0	0	0	0	0	0	0	0	0	0	0	0	0	0	0	0	0	0	0	0	0	0	0	0	0	0	0	0	0	0	0	0	0
2019-08-05	OH_FB_080519	0	0.0925692	0	0	0	0	0.203894	0	0	0.415391	0	0	0	0	0	0	0	0	0	0	0	0	0	0	0	0	0	0	0	0	0	0	0	0	0	0	0	0	0	0	0	0	0	0	0	0	0	0
2019-08-05	OH_FB_080519	0	0.0412239	0	0	0	0	0	0	0	0.196099	0	0	0	0	0	0	0	0	0	0.0366425	0	0	0	0	0	0	0	0	0	0	0	0	0	0	0	0	0	0	0	0	0	0	0	0	0	0	0	0
2019-08-02	OH_FB_080219_1	0	0	0.00587438	0	0	0	0.758784	0	0	0.564592	0	0	0	0	0	0	0	0	0	0.0331675	0	0	0	0	0	0	0	0	0	0	0	0	0	0	0	0	0	0	0	0	0	0	0	0	0	0	0	0
2019-08-02	OH_FB_080219_2	0	0.00260721	0.00473718	0	0	0	0.68317	0	0	0.684732	0	0	0	0	0	0.056276	0	0	0	0.0274194	0	0	0	0	0	0	0	0	0	0	0	0	0	0	0	0	0	0	0	0	0	0	0	0	0	0	0	0
2019-06-21	OH_FB_062119_1	0	0.0144196	0	0.216613	0	0	10.0391	0	0	0	0	0	0	0	0	0	0	0	0	0.00807986	0	0	0	0	0	0	0	0	0	0	0	0	0	0	0	0	0	0	0	0	0	0	0	0	0	0	0	0
2019-06-21	OH_FB_062119_2	0	0.099698	0.182681	0	0	0	5.83984	0	0	0.201041	0	0	0	0	0	0	0	0	0	0.0221102	0	0	0	0	0	0	0	0	0	0	0	0	0	0	0	0	0	0	0	0	0	0	0	0	0	0	0	0
2018-07-29	PA_FB_072918	0	0	7.09282e-05	0	0	0	1.56049e-05	0	0	0.000655962	0.000304965	0	0	0	0	0	0	0	0	2.58987e-05	0	0	0	0	0	0	0	0	0	0	0	0	0	0	0	0	0	0	0	0	0	0	0	0	0	0	0	0
2018-07-30	PA_FB_073018	0	0	4.89763e-05	0	0	0	7.34268e-08	0	0	0.000568568	0.00031757	0	0	0	0	0	0	0	0	2.69159e-05	0	0	0	0	0	0	0	0	0	0	0	0	0	0	0	0	0	0	0	0	0	0	0	0	0	0	0	0
2018-08-05	PA_FB_080518	0	0	0	0	0	0	0	0	0	0	0.0002872	0	0	0	1.57473e-05	0	0	0	0	0	4.77109e-05	0	0	0	0	0	0	0	0	0	2.44629e-05	0	0	0	0	0	0	0	0	0	0	0	0	0	0	0	0	0
2018-08-06	PA_FB_080618	0	0	3.1527e-05	0	0	0	0	0	0	0.000391292	0	0	0	2.49175e-05	0	0	0	0	0	6.97056e-05	0	0	0	0	0	0	0	0	0	0	0	0	0	0	0	0	0	0	0	0	0	0	0	0	0	0	0	0.000112979
2018-08-07	PA_FB_080718	0	0	0	0	0	0	0	0	0	0.000378521	0	0	0	0	0	0	0	0	0	0	0	0	0	0	0	0	0	0	0	0	0	0	0	0	0	0	0	0	0	0	0	0	0	0	0	0	0	0
2018-08-10	PA_FB_081018	0	0	4.7293e-05	0	0	0	0.00160962	0	0	0.000566853	0.000139111	0	0	2.32863e-05	2.99251e-05	0	0	0	0	3.73225e-05	0	0	0	0	0	0	0	0	0	0	0	0	0	0	0	0	0	0	0	0	0	0	0	0	0	0	0	0
2018-08-14	PA_FB_081418	0	0	0	0	0	0	1.67223e-05	0	0	0.00061525	0.000172365	0	0	2.76469e-05	5.52301e-05	0	0.000289649	0	0	3.26361e-05	0	0	0	0	0	0	0	0	0	3.03722e-05	0	0	0	0	0	0	0	0	0	0	0	0	0	0	0	0	0	0
2018-08-15	PA_FB_081518	0	0	0	0	0	0	0	0	0	0.00048678	0	0	0	2.93327e-05	0	0	0	0	0	4.07003e-05	0	0	0	0	0	0	0	0	0	0	0	0	0	0	0	0	0	0	0	0	0	0	0	0	0	0	0	0
2018-08-19	PA_FB_081918	0	0	0	0	0	0	0	0	0	0.000182803	2.45709e-05	0	0	0	0	0	0	0	0	0	0	0	0	0	0	0	0	0	0	0	0	0	0	0	0	0	0	0	0	0	0	0	0	0	0	0	0	0
2018-08-19	PA_FB_081918_2	0	0	0	0	0	0	0	0	0	0.000446028	7.96699e-05	0	0	0	0	0	0	0	0	0	0	0	0	0	0	0	0	0	0	0	0	0	0	0	0	0	0	0	0	0	0	0	0	0	0	0	0	0
2018-08-20	PA_FB_082018	0	0	7.50196e-05	0	0	0	0	0	0	0.000560356	7.74195e-05	0	0	0	0	0	0	0	0	0	0	0	0	0	0	0	0	0	0	0	0	0	0	0	0	0	0	0	0	0	0	0	0	0	0	0	0	0
2018-08-21	PA_FB_082118	1.61722e-05	0	2.33183e-05	0	0	0	0	0	0	0.000385632	0.000188046	0	0	8.25629e-06	3.82586e-05	0	0	0	0	4.09396e-05	0	0	0	0	0	0	0	0	0	0	0	0	0	0	0	0	0	0	0	0	0	0	0	0	0	0	0	0
2018-08-21	PA_FB_082118_2	8.8797e-05	0	0.000161648	0	0	0	0	0	0	0.00052202	0	0	0	2.12742e-05	0	0	0	0	0	0.000147596	0	0	0	0	0	0	0	0	0	0	0	0	0	0	0	0	0	0	0	0	0	0	0	0	0	0	0	0.000188382
2018-08-22	PA_FB_082218	0	0	3.95523e-05	0	0	0	0	0	0	0.000424936	0.000120722	0	0	0	3.57864e-05	0	0	0	0	0	0	0	0	0	0	0	0	0	0	0	0	0	0	0	0	0	0	0	0	0	0	0	0	0	0	0	0	0
2018-08-23	PA_FB_082318	2.10679e-05	0	4.89207e-05	0	0	0	0	0	0	0.000572611	0.000111535	0	0	0	4.16954e-05	0	0.000197275	0	0	0	0	0	0	0	0	0	0	0	0	0	0	0	0	0	0	0	0	0	0	0	0	0	0	0	0	0	0	0
2018-09-17	PA_FB_091718	0	0	4.80944e-05	0	0	0	0	0	0	0.000335223	0.00645856	0	0	5.0616e-05	9.86721e-05	0	0	0.000256023	0	0	0	0	0	0	0	0	0	0	0	0	0	0	0	0	0	0	0	0	0	0	0	0	0	0	0	0	0	0
2018-08-24	PA_FB_082418	8.23723e-05	0	7.09063e-05	0	0	5.65217e-05	0	0	0	0.00040671	0.00013204	0	0	7.02041e-05	7.22305e-05	0	0	0	0	0	0	0	0	0	0	0	0	0	0	0.000103251	0	0	0	0	0	0	0	0	0	0	0	0	0	0	0	0	0	0
2018-08-25	PA_FB_082518	0	7.08101e-05	5.98147e-06	0	0	0	0	0	0	0.000268169	0	0	0	0.000443897	0	0	0	0	0	0.00196081	0	0	0	0	0	0	0	0	0	0	0	0	0	0	0	0	0	0	0	0	0	0	0	0	0	0	0	0
2018-08-26	PA_FB_082618	0	0	6.61292e-06	0	0	0	6.20899e-05	0	0	0.000477183	0	0	0	0	5.08596e-05	1.7271e-05	0	0	0	5.59887e-06	0	0	0	0	0	0	0	0	0	0	0	0	0	0	0	0	0	0	0	0	0	0	0	0	0	0	0	0
2018-08-27	PA_FB_082718	0	0	2.24914e-05	0	0	0	4.60218e-05	0	0	0.000463335	7.60301e-05	0	0	0	2.0906e-05	2.84314e-05	0	0	0	0	0	0	0	0	0	0	0	0	0	0	0	0	0	0	0	0	0	0	0	0	0	0	0	0	0	0	0	0
2018-09-15	PA_FB_091518	0	0	0	0	0	0	0	0	0	0.000238448	0.0059399	0	0	4.46089e-05	5.25601e-05	0	0	0.000250404	0	3.54999e-05	0	0	0	0	0	0	0	0	0	0	0	0	0	0	0	0	0	0	0	0	0	0	0	0	0	0	0	0
2018-08-22	PA_FB_082218_2	0	0	0	0	0	0	0	0	0	0.000131291	0.00646065	0	0	0	1.15102e-05	0	0	0.000218704	0	0	0	0	0	0	0	0	0	0	0	0	0	0	0	0	0	0	0	0	0	0	0	0	0	0	0	0	0	0
2018-08-01	PA_FB_080118	0	0	0	0	0	0	0	0	0	0.000930038	0.000443927	0	0	0	0	0	0	0	0	0	0	0	0	0	0	0	0	0	0	0	0	0	0	0	0	0	0	0	0	0	0	0	0	0	0	0	0	0
2018-08-02	PA_FB_080218	0	0	0	0	0	0	0	0	0	0.0014826	0.000466055	0	0	0	0	0	0.000177443	0	0	0	0	0	0	0	0	0	0	0	0	0	0	0	0	0	0	0	0	0	0	0	0	0	0	0	0	0	0	0
2018-08-03	PA_FB_080318	3.30295e-05	4.85959e-05	0.00124246	0	3.15203e-05	0.00121317	0.0436753	0	0	0.279528	0.0962475	0	0	0.00830755	0.00176551	0	0.186896	0.0336999	0	0.0005384	0	0	0	0	0.0208003	0	0	0	3.64536e-05	0.000370796	0.000794415	0	0	0	0	0	0	0	0	0	0	0	0	0	0	0	0	0
2018-08-08	PA_FB_080818	0	0	0	0	0	0	0	0	0	0.000419238	0.000168176	0	0	5.25687e-05	0	0	0	0	0	4.36109e-05	0	0	0	0	0	0	0	0	0	0	0	0	0	0	0	0	0	0	0	0	0	0	0	0	0	0	0	0
2018-08-09	PA_FB_081918	0	0	0	0	0	0	0.000354518	0	0	0.000402401	0	0	0	4.83975e-06	0	0	0	0	0	4.40457e-05	0	0	0	0	0	0	0	0	0	0	0	0	0	0	0	0	0	0	0	0	0	0	0	0	0	0	0	0
2018-08-11	PA_FB_081118	0	0	0	0	0	0	0	0	0	0.000572498	0.00020868	0	0	0	0	0	0	0	0	0	0	0	0	0	0	0	0	0	0	0	0	0	0	0	0	0	0	0	0	0	0	0	0	0	0	0	0	0
2018-08-13	PA_FB_081318	0	0	0	0	0	0	0	0	0	0.000431862	0.000153108	0	0	0	0	0	0	0	0	0	0	0	0	0	0	0	0	0	0	0	0	0	0	0	0	0	0	0	0	0	0	0	0	0	0	0	0	0
2018-08-16	PA_FB_081618	0	0	0	0	0	3.19725e-05	0	0	0	0.000886766	0.000186885	0	0	4.03387e-05	5.71461e-05	6.76044e-05	0.000369507	0	0	2.6675e-05	0	0	0	0	0	0	0	0	0	0	0	0	0	0	0	0	0	0	0	0	0	0	0	0	0	0	0	0
2018-08-17	PA_FB_081718	0	0	0	0	0	0	0	0	0	0.000432035	0.000140419	0	0	1.1614e-05	4.80625e-05	0	0	0	0	0	0	0	0	0	0	0	0	0	0	0	0	0	0	0	0	0	0	0	0	0	0	0	0	0	0	0	0	0
[truncated: 2 more columns]

## Sheet: Laboratory Blank Data
Note: Reported concentrations in ug/L
Date	Sample	chloromethane	vinyl chloride	bromomethane	chloroethane	trichlorofluoromethane	1,1-dichloroethene & trans-1,2-dichloroethene	dichloromethane	1,1-dichloroethane	2,2-dichloropropane & cis-1,2-dichloroethene	bromochloromethane	chloroform	1,1,1-trichloroethane	1,1-dichloropropene & carbon tetrachloride	1,2-dichloroethane & Benzene	trichloroethene	1,2-dichloropropane	dibromomethane	bromodichloromethane	cis-1,3-dichloropropene	toluene	trans-1,3-dichloropropene	1,1,2-trichloroethane	1,3-dichloropropane	tetrachloroethene	dibromochloromethane	1,2-dibromoethane (EDB)	chlorobenzene	1,1,1,2-tetrachloroethane	ethylbenzene	p-xylene & m-xylene	o-xylene, styrene & bromoform	1,1,2,2-tetrachloroethane	isopropylbenzene (cumene) & n-propylbenzene	bromobenzene	1,2,3-trichloropropane	1,3,5-trimethylbenzene	2-chlorotoluene	4-chlorotoluene	tert-butylbenzene	1,2,4-trimethylbenzene	sec-butylbenzene	1,3-dichlorobenzene	p-isopropyltoluene	1,4-dichlorobenzene	n-butylbenzene & 1,2-dichlorobenzene	1,2-dibromo-3-chloropropane	1,2,4-trichlorobenzene	hexachlorobutadiene
2020-11-27	WV_Blank44162	0	0	0	0	0	0	0.664935	0	0	0	0	0	0	0	0	0	0	0	0	0	0	0	0	0	0	0	0	0	0	0	0	0	0	0	0	0	0	0	0	0	0	0	0	0	0	0	0	0
2020-11-27	WV_Blank44162	0	0	0	0	0	0	0.611029	0	0	0	0	0	0	0	0	0	0	0	0	0	0	0	0	0	0	0	0	0	0	0	0	0	0	0	0	0	0	0	0	0	0	0	0	0	0	0	0	0
2020-11-27	WV_Blank44162	0	0	0	0	0	0	0.570794	0	0	0	0	0	0	0	0	0	0	0	0	0	0	0	0	0	0	0	0	0	0	0	0	0	0	0	0	0	0	0	0	0	0	0	0	0	0	0	0	0
2020-11-27	WV_Blank44162	0	0	0	0	0	0	0.590462	0	0	0	0	0	0	0	0	0	0	0	0	0	0	0	0	0	0	0	0	0	0	0	0	0	0	0	0	0	0	0	0	0	0	0	0	0	0	0	0	0
2020-11-27	WV_Blank44162	0	0	0	0	0	0	0.644531	0	0	0	0	0	0	0	0	0	0	0	0	0	0	0	0	0	0	0	0	0	0	0	0	0	0	0	0	0	0	0	0	0	0	0	0	0	0	0	0	0
2020-11-27	WV_Blank44162	0	0	1.14514	0	0	0	0.364603	0	0	0	0	0	0	0	0	0	0	0	0	0	0	0	0	0	0	0	3.33207	0	0	0	0	0	0	0	0	0	0	0	0	0	0	0	0	0	0	0	0	0
2020-12-01	WV_Blank44166	0	0	0	0	0	0	0.716094	0	0	0	0	0	0	0	0	0	0	0	0	0	0	0	0	0	0	0	0	0	0	0	0	0	0	0	0	0	0	0	0	0	0	0	0	0	0	0	0	0
2020-12-01	WV_Blank44166	0	0	0	0	0	0	0.741324	0	0	0	0	0	0	0	0	0	0	0	0	0	0	0	0	0	0	0	0	0	0	0	0	0	0	0	0	0	0	0	0	0	0	0	0	0	0	0	0	0
2020-12-01	WV_Blank44166	0	0	0	0	0	0	0.668936	0	0	0	0	0	0	0	0	0	0	0	0	0	0	0	0	0	0	0	0	0	0	0	0	0	0	0	0	0	0	0	0	0	0	0	0	0	0	0	0	0
2020-12-01	WV_Blank44166	0	0	0	0	0	0	0.672324	0	0	0	0	0	0	0	0	0	0	0	0	0	0	0	0	0	0	0	0	0	0	0	0	0	0	0	0	0	0	0	0	0	0	0	0	0	0	0	0	0
2020-12-09	WV_Blank44174	0	0	0	0	0	0	0.624251	0	0	0	0	0	0	0	0	0	0	0	0	0	0	0	0	0	0	0	0	0	0	0	0	0	0	0	0	0	0	0	0	0	0	0	0	0	0	0	0	0
2020-12-09	WV_Blank44174	0	0	0	0	0	0	0.641442	0	0	0	0	0	0	0	0	0	0	0	0	0	0	0	0	0	0	0	0	0	0	0	0	0	0	0	0	0	0	0	0	0	0	0	0	0	0	0	0	0
2020-12-09	WV_Blank44174	0	0	0	0	0	0	0.673359	0	0	0	0	0	0	0	0	0	0	0	0	0	0	0	0	0	0	0	0	0	0	0	0	0	0	0	0	0	0	0	0	0	0	0	0	0	0	0	0	0
2020-12-09	WV_Blank44174	0	0	0	0	0	0	0.716706	0	0	0	0	0	0	0	0	0	0	0	0	0	0	0	0	0	0	0	0	0	0	0	0	0	0	0	0	0	0	0	0	0	0	0	0	0	0	0	0	0
2020-12-09	WV_Blank44174	0	0	0	0	0	0	0.668258	0	0	0	0	0	0	0	0	0	0	0	0	0	0	0	0	0	0	0	0	0	0	0	0	0	0	0	0	0	0	0	0	0	0	0	0	0	0	0	0	0
2020-12-09	WV_Blank44174	0	0	0	0	0	0	0.693577	0	0	0	0	0	0	0	0	0	0	0	0	0	0	0	0	0	0	0	0	0	0	0	0	0	0	0	0	0	0	0	0	0	0	0	0	0	0	0	0	0
2020-12-11	WV_Blank44176	0	0	0	0	0	0	0.708502	0	0	0	0	0	0	0	0	0	0	0	0	0	0	0	0	0	0	0	0	0	0	0	0	0	0	0	0	0	0	0	0	0	0	0	0	0	0	0	0	0
2020-12-11	WV_Blank44176	0	0	0	0	0	0	0.729841	0	0	0	0	0	0	0	0	0	0	0	0	0	0	0	0	0	0	0	0	0	0	0	0	0	0	0	0	0	0	0	0	0	0	0	0	0	0	0	0	0
2020-12-11	WV_Blank44176	0	0.21154	0	0	0	0	0.716932	0	0	0	0	0	0	0.240348	0	0	0	0	0	0	0	0	0	0	0	0	0	0	0	0	0	0	0	0	0	0	0	0	0	0	0	0	0	0	0	0	0	0
2020-12-11	WV_Blank44176	0	0	0	0	0	0	0.734258	0	0	0	0	0	0	0	0	0	0	0	0	0	0	0	0	0	0	0	0	0	0	0	0	0	0	0	0	0	0	0	0	0	0	0	0	0	0	0	0	0
2020-12-15	WV_Blank44180	0	0	0	0	0	0	1.13414	0	0	0	0	0	0	0	0	0	0	0	0	0	0	0	0	0	0	0	0	0	0	0	0	0	0	0	0	0	0	0	0	0	0	0	0	0	0	0	0	0
2020-12-15	WV_Blank44180	0	0	0	0	0	0	1.12695	0	0	0	0	0	0	0	0	0	0	0	0	0	0	0	0	0	0	0	0	0	0	0	0	0	0	0	0	0	0	0	0	0	0	0	0	0	0	0	0	0
2020-12-15	WV_Blank44180	0	0	0	0	0	0	0.772633	0	0	0	0	0	0	0	0	0	0	0	0	0	0	0	0	0	0	0	0	0	0	0	0	0	0	0	0	0	0	0	0	0	0	0	0	0	0	0	0	0
2020-12-15	WV_Blank44180	0	0	0	0	0	0	1.1148	0	0	0	0	0	0	0	0	0	0	0	0	0	0	0	0	0	0	0	0	0	0	0	0	0	0	0	0	0	0	0	0	0	0	0	0	0	0	0	0	0
2020-12-15	WV_Blank44180	0	0	0	0	0	0	1.05593	0	0	0	0	0	0	0	0	0	0	0	0	0	0	0	0	0	0	0	0	0	0	0	0	0	0	0	0	0	0	0	0	0	0	0	0	0	0	0	0	0
2020-12-16	WV_Blank44181	0	0	0	0	0	0	0.761447	0	0	0	0	0	0	0	0	0	0	0	0	0	0	0	0	0	0	0	0	0	0	0	0	0	0	0	0	0	0	0	0	0	0	0	0	0	0	0	0	0
2020-12-16	WV_Blank44181	0	0	0	0	0	0	0.752005	0	0	0	0	0	0	0	0	0	0	0	0	0	0	0	0	0	0	0	0	0	0	0	0	0	0	0	0	0	0	0	0	0	0	0	0	0	0	0	0	0
2020-12-16	WV_Blank44181	0	0	0	0	0	0	0.780216	0	0	0	0	0	0	0	0	0	0	0	0	0	0	0	0	0	0	0	0	0	0	0	0	0	0	0	0	0	0	0	0	0	0	0	0	0	0	0	0	0
2020-12-17	WV_Blank44182	0	0	0	0	0	0	0.0953605	0	0	0	0	0	0	0	0	0	0	0	0	0	0	0	0	0	0	0	0	0	0	0	0	0	0	0	0	0	0	0	0.0134914	0	0	0	0	0	0	0	0	0
2020-12-17	WV_Blank44182	0	0	0	0	0	0	0.181025	0	0	0	0	0	0	0	0	0	0	0	0	0	0	0	0	0	0	0	0	0	0	0	0	0	0	0	0	0	0	0	0	0	0	0	0	0	0	0	0	0
2020-12-17	WV_Blank44182	0	0	0	0	0	0	0.200231	0	0	0	0	0	0	0	0	0	0	0	0	0	0	0	0	0	0	0	0	0	0	0	0	0	0	0	0	0	0	0	0	0	0	0	0	0	0	0	0	0
2020-12-18	WV_Blank44183	0	0	0	0	0	0	1.19641	0	0	0	0	0	0	0	0	0	0	0	0	0	0	0	0	0	0	0	0	0	0	0	0	0	0	0	0	0	0	0	0	0	0	0	0	0	0	0	0	0
2020-12-18	WV_Blank44183	0	0	0	0	0	0	0.967187	0	0	0	0	0	0	0	0	0	0	0	0	0	0	0	0	0	0	0	0	0	0	0	0	0	0	0	0	0	0	0	0	0	0	0	0	0	0	0	0	0
2020-12-18	WV_Blank44183	0	0.451284	0	1.56203	0	0	0.804622	0	0	0	0	0	0	0	0	0	0	0	0	0	0	0	0	0	0	0	0	0	0	0	0	0	0	0	0	0	0	0	0	0	0	0	0	0	0	0	0	0
2020-12-18	WV_Blank44183	0	0	0	0	0	0	0.803167	0	0	0	0	0	0	0	0	0	0	0	0	0	0	0	0	0	0	0	0	0	0	0	0	0	0	0	0	0	0	0	0	0	0	0	0	0	0	0	0	0
2020-12-19	WV_Blank44184	0	0	0	0	0	0	1.3409	0	0	0	0	0	0	0	0	0	0	0	0	0	0	0	0	0	0	0	0	0	0	0	0	0	0	0	0	0	0	0	0	0	0	0	0	0	0	0	0	0
2020-12-19	WV_Blank44184	0	0	0	0	0	0	0.988951	0	0	0	0	0	0	0	0	0	0	0	0	0	0	0	0	0	0	0	0	0	0	0	0	0	0	0	0	0	0	0	0	0	0	0	0	0	0	0	0	0
2019-08-13	OH_Blank43690	0	0	0	0	0	0	1.44413	0	0	0	0	0	0	0	0	0	0	0	0	0	0	0	0	0	0	0	0	0	0	0	0	0	0	0	0	0	0	0	0.238298	0	0	0	0	0	0	0.110026	0	0
2019-08-13	OH_Blank43690	0	0	0	0	0	0	2.09048	0	0	0	0	0	0	0	0	0	0	0	0	0	0	0	0	0	0	0	0	0	0	0	0	0	0	0	0	0	0	0	0	0	0	0	0	0	0	0	0	0
2019-08-13	OH_Blank43690	0	0	0	0	0	0.0213892	1.75932	0	0	0	0	0	0	0	0	0	0	0	0	0	0	0	0	0	0	0	0	0	0	0	0	0	0	0	0	0	0	0	0	0	0	0	0	0	0	0	0	0
2019-08-13	OH_Blank43690	0	0	0	0	0	0	2.81228	0	0	0	0	0	0	0	0	0	0	0	0	0	0	0	0	0	0	0	0	0	0	0	0	0	0	0	0	0	0	0	0	0	0	0	0	0	0	0	0	0
2019-08-14	OH_Blank43691	0	0	0	0	0	0	0.419993	0	0	0	0	0	0	0	0	0	0	0	0	0	0	0.401155	0	0	0	0	0	0	0	0.441185	0.419954	0	0.473906	0	0	0	0	0	0	0	0	0	0	0	0	0	0	0
2019-08-14	OH_Blank43691	0	0	0	0	0	0	0.482318	0	0	0	0	0	0	0	0	0	0	0	0	0	0	0	0	0	0	0	0	0	0	0	0	0	0	0	0	0	0	0	0	0	0	0	0	0	0	0	0	0
2019-08-14	OH_Blank43691	0	0	0	0	0	0	0.506523	0	0	0	0	0	0	0	0	0	0	0	0	0	0	0	0	0	0	0	0	0	0	0	0	0	0	0	0	0	0	0	0	0	0	0	0	0	0	0	0	0
2019-08-14	OH_Blank43691	0	0	0	0	0	0	0.449333	0	0	0	0	0	0	0	0	0	0	0	0	0	0	0	0	0	0	0	0	0	0	0	0	0	0	0	0	0	0	0	0	0	0	0	0	0	0	0	0	0
2019-08-09	OH_Blank43686	0	0	0	0	0	0	0	0	0	0	0	0	0	0	0	0	0	0	0	0	0	0	0	0	0	0	0	0.0209565	0	0	0	0	0	0	0	0	0	0	0.157836	0	0	0	0	0	0	0	0	0
2019-08-09	OH_Blank43686	0	0	0	0	0	0	0.5159	0	0	0	0	0	0	0	0	0	0	0	0	0	0	0	0	0	0	0	0	0	0	0	0	0	0	0	0	0	0	0	0	0	0	0	0	0	0	0	0	0
2019-08-09	OH_Blank43686	0	0	0	0	0	0	0	0	0	0	0	0	0	0	0	0	0	0	0	0	0	0	0	0	0	0	0	0	0	0	0	0	0	0	0	0	0	0	0	0	0	0	0	0	0	0	0	0
2019-08-09	OH_Blank43686	0	0	0	0	0	0	0	0	0	0	0	0	0	0	0	0	0	0	0	0	0	0	0	0	0	0	0	0	0	0	0	0	0	0	0	0	0	0	0	0	0	0	0	0	0	0	0	0
2019-08-09	OH_Blank43686	0	0	0	0	0	0	0	0	0	0	0	0	0	0	0	0	0	0	0	0	0	0	0	0	0	0	0	0	0	0	0	0	0	0	0	0	0	0	0	0	0	0	0	0	0	0	0	0
2019-08-12	OH_Blank43689	0	0	0	0	0	0	0.462122	0	0	0	0	0	0	0	0	0	0	0	0	0	0	0	0	0	0	0	0	0	0	0	0	0	0	0	0	0	0	0	0	0	0	0	0	0	0	0	0	0
2019-08-12	OH_Blank43689	0	0	0	0	0	0	0.339639	0	0	0	0	0	0	0	0.299596	0	0	0	0	0	0	0	0	0	0	0	0	0	0	0	0	0	0	0	0	0	0	0	0	0	0	0	0	0	0	0	0	0
2019-08-12	OH_Blank43689	0	0	0	0	0	0	0.377793	0	0	0	0	0	0	0	0	0	0	0	0	0	0	0	0	0	0	0	0	0	0	0	0	0	0	0	0	0	0	0	0	0	0	0	0	0	0	0	0	0
2019-08-12	OH_Blank43689	0	0	0	0	0	0	0.412311	0	0	0	0	0	0	0	0	0	0	0	0	0	0	0	0	0	0	0	0	0	0	0	0	0	0	0	0	0	0	0	0	0	0	0	0	0	0	0	0	0
2019-08-07	OH_Blank43684	0	0	0	0	0	0	0	0	0	0	0	0	0	0	0	0	0	0	0	0	0	0	0	0	0	0	0	0	0	0	0	0	0	0	0	0	0	0	0	0	0	0	0	0	0	0	0	0
2019-08-08	OH_Blank43685	0	0	0	0	0	0	0	0	0	0	0	0	0	0	0	0	0	0	0	0	0	0	0	0	0	0	0	0	0	0	0	0	0	0	0	0	0	0	0	0	0	0	0	0	0	0	0	0
2019-08-08	OH_Blank43685	0	0	0	0	0	0	0	0	0	0	0	0	0	0	0	0	0	0	0	0	0	0	0	0	0	0	0	0	0	0	0	0	0	0	0	0	0	0	0	0	0	0	0	0	0	0	0	0
2019-08-08	OH_Blank43685	0	0	0	0	0	0	0	0	0	0	0	0	0	0	0.0573619	0	0	0	0	0	0	0	0	0	0	0	0	0	0	0	0	0	0	0	0	0	0	0	0	0	0	0	0	0	0	0	0	0
2019-08-06	OH_Blank43683	0	0	0	0	0	0	0	0	0	0	0	0	0	0	0	0	0	0	0	0	0	0	0	0	0	0	0	0	0	0	0	0	0	0	0	0	0	0	0.609726	0	0	0	0	0	0	0	0	0
2019-08-06	OH_Blank43683	0	0	0	0	0	0	0	0	0	0	0	0	0	0	0	0	0	0	0	0	0	0	0	0	0	0	0	0	0	0	0	0	0	0	0	0	0	0	0	0	0	0	0	0	0	0	0	0
2019-08-06	OH_Blank43683	0	0	0	0	0	0	0	0	0	0	0	0	0	0	0	0	0	0	0	0	0	0	0	0	0	0	0	0	0	0	0	0	0	0	0	0	0	0	0	0	0	0	0	0	0	0	0	0
2019-08-06	OH_Blank43683	0	0	0	0	0	0	0	0	0	0	0	0	0	0	0.0698611	0	0	0	0	0	0	0	0	0	0	0	0	0	0	0	0	0	0	0	0	0	0	0	0	0	0	0	0	0	0	0	0	0
2019-08-06	OH_Blank43683	0	0	0	0	0	0	0	0	0	0	0	0	0	0	0	0	0	0	0	0	0	0	0	0	0	0	0	0	0	0	0	0	0	0	0	0	0	0	0	0	0	0	0	0	0	0	0	0
2019-08-21	OH_Blank43698	0	0	0	0	0	0	0.0985825	0	0	0	0	0	0	0	0	0	0	0	0	0	0	0	0	0	0	0	0	0	0	0	0	0	0	0	0	0	0	0	0	0	0	0	0	0	0	0	0	0
2019-08-21	OH_Blank43698	0	0	0	0	0	0	0	0	0	0	0	0	0	0	0	0	0	0	0	0	0	0	0	0	0	0	0	0	0	0	0	0	0	0	0	0	0	0	0	0	0	0	0	0	0	0	0	0
2019-08-21	OH_Blank43698	0	0	0	0	0	0	0	0	0	0	0	0	0	0	0	0	0	0	0	0	0	0	0	0	0	0	0	0	0	0	0	0	0	0	0	0	0	0	0	0	0	0	0	0	0	0	0	0
2019-08-21	OH_Blank43698	0	0	0	0	0	0	0.10641	0	0	0	0	0	0	0	0	0	0	0	0	0	0	0	0	0	0	0	0	0	0	0	0	0	0	0	0	0	0	0	0	0	0	0	0	0	0	0	0	0
2019-08-05	OH_Blank43682	0	0	0	0	0	0	0	0	0	0	0	0	0	0	0	0	0	0	0	0	0	0	0	0	0	0	0	0	0	0	0	0	0	0	0	0	0	0	0	0	0	0	0	0	0	0	0	0
2019-08-05	OH_Blank43682	0	0	0	0	0	0	0	0	0	0	0	0	0	0	0	0	0	0	0	0	0	0	0	0	0	0	0	0	0	0	0	0	0	0	0	0	0	0	0	0	0	0	0	0	0	0	0	0
2019-08-05	OH_Blank43682	0	0	0	0	0	0	0	0	0	0	0	0	0	0	0	0	0	0	0	0	0	0	0	0	0	0	0	0	0	0	0	0	0	0	0	0	0	0	0	0	0	0	0	0	0	0	0	0
2019-08-05	OH_Blank43682	0	0	0	0	0	0	0	0	0	0	0	0	0	0	0	0	0	0	0	0	0	0	0	0	0	0	0	0	0	0	0	0	0	0	0	0	0	0	0	0	0	0	0	0	0	0	0	0
2019-06-18	OH_Blank43634	0	0	0	0	0	0	0	0	0	0	0	0	0	0	0	0	0	0	0	0	0	0	0	0	0	0	0	0	0	0	0	0	0	0	0	0	0	0	0	0	0	0	0	0	0	0	0	0
2019-06-18	OH_Blank43634	0	0	0	0	0	0	0	0	0	0	0	0	0	0	0	0	0	0	0	0	0	0	0	0	0	0	0	0	0	0	0	0	0	0	0	0	0	0	0	0	0	0	0	0	0	0	0	0
2019-06-18	OH_Blank43634	0	0	0	0	0	0	0	0	0	0	0	0	0	0	0	0	0	0	0	0	0	0	0	0	0	0	0	0	0	0	0	0	0	0	0	0	0	0	0	0	0	0	0	0	0	0	0	0
2019-06-18	OH_Blank43634	0	0	0	0	0	0	0	0	0	0	0	0	0	0	0	0	0	0	0	0	0	0	0	0	0	0	0	0	0	0	0	0	0	0	0	0	0	0	0	0	0	0	0	0	0	0	0	0
2019-08-01	OH_Blank43678	0	0	0	0	0	0	0	0	0	0	0	0	0	0	0	0	0	0	0	0	0	0	0	0	0	0	0	0	0	0	0	0	0	0	0	0	0	0	9.92254e-05	0	0	0	0	0	0	0	0	0
2019-07-06	OH_Blank43652	0	0	0	0	0	0	0	0	0	0	0	0	0	0	0	0	0	0	0	0	0	0	0	0	0	0	0	0	0	0	0	0	0	0	0	0	0	0	0	0	0	0	0	0	0	0	0	0
2019-07-06	OH_Blank43652	0	0	0	0	0	0	0	0	0	0	0	0	0	0	0	0	0	0	0	0	0	0	0	0	0	0	0	0	0	0	0	0	0	0	0	0	0	0	0	0	0	0	0	0	0	0	0	0
2019-07-06	OH_Blank43652	0	0	0	0	0	0	0	0	0	0	0	0	0	0	0	0	0	0	0	0	0	0	0	0	0	0	0	0	0	0	0	0	0	0	0	0	0	0	0	0	0	0	0	0	0	0	0	0
2019-07-31	OH_Blank43677	0	0	0	0	0	0	0	0	0	0	0	0	0	0	0	0	0	0	0	0	0	0	0	0	0	0	0	0	0	0	0	0	0	0	0	0	0	0	0	0	0	0	0	0	0	0	0	0
2019-07-31	OH_Blank43677	0	0	0	0	0	0	0	0	0	0	0	0	0	0	0	0	0	0	0	0	0	0	0	0	0	0	0	0	0	0	0	0	0	0	0	0	0	0	0	0	0	0	0	0	0	0	0	0
2019-07-31	OH_Blank43677	0	0	0	0	0	0	0	0	0	0	0	0	0	0	0	0	0	0	0	0	0	0	0	0	0	0	0	0	0	0	0	0	0	0	0	0	0	0	0	0	0	0	0	0	0	0	0	0
2019-07-30	OH_Blank43676	0	0	0	0	0	0	0	0	0	0	0	0	0	0	0	0	0	0	0	0	0	0	0	0	0	0	0	0	0	0	0	0	0	0	0	0	0	0	0	0	0	0	0	0	0	0	0	0
2019-07-30	OH_Blank43676	0	0	0	0	0	0	0	0	0	0	0	0	0	0	0	0	0	0	0	0	0	0	0	0	0	0	0	0	0	0	0	0	0	0	0	0	0	0	0	0	0	0	0	0	0	0	0	0
2019-07-30	OH_Blank43676	0	0	0	0	0	0	0.00378984	0	0	0	0	0	0	0	0	0	0	0	0	0	0	0	0	0	0	0	0	0	0	0	0	0	0	0	0	0	0	0	0	0	0	0	0	0	0	0	0	0
2019-07-30	OH_Blank43676	0	0	0	0	0	0	0	0	0	0	0	0	0	0	0	0	0	0	0	0	0	0	0	0	0	0	0	0	0	0	0	0	0	0	0	0	0	0	0	0	0	0	0	0	0	0	0	0
2019-06-27	OH_Blank43643	0	0	0	0	0	0	0	0	0	0	0	0	0	0	0	0	0	0	0	0	0	0	0	0	0	0	0	0	0	0	0	0	0	0	0	0	0	0	0	0	0	0	0	0	0	0	0	0
2019-06-27	OH_Blank43643	0	0	0	0	0	0	0	0	0	0	0	0	0	0	6.70065e-05	0	0	0	0	0	0	0	0	0	0	0	0	0	0	0	0	0	0	0	0	0	0	0	0	0	0	0	0	0	0	0	0	0
2019-06-27	OH_Blank43643	0	0	0	0	0	0	0	0	0	0	0	0	0	0	0	0	0	0	0	0	0	0	0	0	0	0	0	0	0	0	0	0	0	0	0	0	0	0	0	0	0	0	0	0	0	0	0	0
2019-06-20	OH_Blank43636	0	0	0	0	0	0	2.77508e-05	0	0	0	0	0	0	0	0	0	0	0	0	0	0	0	0	0	0	0	0	0	0	0	0	0	0	0	0	0	0	0	0	0	0	0	0	0	0	0	0	0
2019-06-20	OH_Blank43636	0	0	0	0	0	0	5.37498e-05	0	0	0	0	0	0	0	0	0	0	0	0	0	0	0	0	0	0	0	0	0	0	0	0	0	0	0	0	0	0	0	0	0	0	0	0	0	0	0	0	0
2019-06-20	OH_Blank43636	0	0	0	0	0	0	2.27542e-05	0	0	0	0	0	0	0	0	0	0	0	0	0	0	0	0	0	0	0	0	0	0	0	0	0	0	0	0	0	0	0	0	0	0	0	0	0	0	0	0	0
2019-06-20	OH_Blank43636	0	0	0	0	0	0	1.80196e-05	0	0	0	0	0	0	0	0	0	0	0	0	0	0	0	0	0	0	0	0	0	0	0	0	0	0	0	0	0	0	0	0	0	0	0	0	0	0	0	0	0
2019-07-29	OH_Blank43675	0	0	0	0	0	0	0	0	0	0	0	0	0	0	0	0	0	0	0	0	0	0	0	0	0	0	0	0	0	0	0	0	0	0	0	0	0	0	0	0	0	0	0	0	0	0	0	0
2019-07-29	OH_Blank43675	0	0	0	0	0	0	0	0	0	0	0	0	0	0	0	0	0	0	0	0	0	0	0	0	0	0	0	0	0	0	0	0	0	0	0	0	0	0	0	0	0	0	0	0	0	0	0	0
2019-07-29	OH_Blank43675	0	0	0	0	0	0	0	0	0	0	0	0	0	0	0	0	0	0	0	0	0	0	0	0	0	0	0	0	0	0	0	0	0	0	0	0	0	0	0	0	0	0	0	0	0	0	0	0
2019-07-26	OH_Blank43672	0	0	0	0	0	0	0	0	0	0	0	0	0	0	0	0	0	0	0	0	0	0	0	0	0	0	0	0	0	0	0	0	0	0	0	0	0	0	0	0	0	0	0	0	0	0	0	0
2019-07-26	OH_Blank43672	0	0	0	0	0	0	0	0	0	0	0	0	0	0	0	0	0	0	0	0	0	0	0	0	0	0	0	0	0	0	0	0	0	0	0	0	0	0	0	0	0	0	0	0	0	0	0	0
2019-07-26	OH_Blank43672	0	0	0	0	0	0	0	0	0	0	0	0	0	0	0	0	0	0	0	0	0	0	0	0	0	0	0	0	0	0	0	0	0	0	0	0	0	0	0	0	0	0	0	0	0	0	0	0
2019-07-08	OH_Blank43654	0	0	0	0	0	0	0.000712882	0	0	0	0	0	0	0	0	0	0	0	0	0	0	0	0	0	0	0	0	0	0	0	0	0	0	0	0	0	0	0	0	0	0	0	0	0	0	0	0	0
2019-07-08	OH_Blank43654	0	0	0	0	0	0	0.000842982	0	0	0	0	0	0	0	0	0	0	0	0	0	0	0	0	0	0	0	0	0	0	0	0	0	0	0	0	0	0	0	0	0	0	0	0	0	0	0	0	0
2019-07-08	OH_Blank43654	0	0	0	0	0	0	0.00099326	0	0	0	0	0	0	0	0	0	0	0	0	0	0	0	0	0	0	0	0	0	0	0	0	0	0	0	0	0	0	0	0	0	0	0	0	0	0	0	0	0
2019-07-08	OH_Blank43654	0	0	0	0	0	0	0.000662073	0	0	0	0	0	0	0	0	0	0	0	0	0	0	0	0	0	0	0	0	0	0	0	0	0	0	0	0	0	0	0	0	0	0	0	0	0	0	0	0	0
2019-07-05	OH_Blank43651	0	0	0	0	0	0	2.21989e-05	0	0	0	0	0	0	0	0	0	0	0	0	0	0	0	0	0	0	0	0	0	0	0	0	0	0	0	0	0	0	0	0	0	0	0	0	0	0	0	0	0
2019-07-05	OH_Blank43651	0	0	0	0	0	0	1.5697e-05	0	0	0	0	0	0	0	0	0	0	0	0	0	0	0	0	0	0	0	0	0	0	0	0	0	0	0	0	0	0	0	0	0	0	0	0	0	0	0	0	0
2019-07-05	OH_Blank43651	0	0	0	0	0	0	7.2631e-05	0	0	0	0	0	0	0	0	0	0	0	0	0	0	0	0	0	0	0	0	0	0	0	0	0	0	0	0	0	0	0	0	0	0	0	0	0	0	0	0	0
2010-07-19	OH_Blank40378	0	0	0	0	0	0	0	0	0	0	0	0	0	0	0	0	0	0	0	0	0	0	0	0	0	0	0	0	0	0	0	0	0	0	0	0	0	0	0	0	0	0	0	0	0	0	0	0
2010-07-19	OH_Blank40378	0	0	0	0	0	0	0	0	0	0	0	0	0	0	0	0	0	0	0	0	0	0	0	0	0	0	0	0	0	0	0	0	0	0	0	0	0	0	0	0	0	0	0	0	0	0	0	0
2010-07-19	OH_Blank40378	0	0	0	0	0	0	0	0	0	0	0	0	0	0	0	0	0	0	0	0	0	0	0	0	0	0	0	0	0	0	0	0	0	0	0	0	0	0	0	0	0	0	0	0	0	0	0	0
2019-07-15	OH_Blank43661	0	0	0	0	0	0	0	0	0	0	0	0	0	0	0	0	0	0	0	0	0	0	0	0	0	0	0	0	0	0	0	0	0	0	0	0	0	0	0	0	0	0	0	0	0	0	0	0
2019-07-15	OH_Blank43661	0	0	0	0	0	0	0	0	0	0	0	0	0	0	0	0	0	0	0	0	0	0	0	0	0	0	0	0	0	0	0	0	0	0	0	0	0	0	0	0	0	0	0	0	0	0	0	0
2019-07-15	OH_Blank43661	0	0	0	0	0	0	0	0	0	0	0	0	0	0	0	0	0	0	0	0	0	0	0	0	0	0	0	0	0	0	0	0	0	0	0	0	0	0	0	0	0	0	0	0	0	0	0	0
2019-07-14	OH_Blank43660	0	0	0	0	0	0	0	0	0	0	0	0	0	0	0	0	0	0	0	0	0	0	0	0	0	0	0	0	0	0	0	0	0	0	0	0	0	0	0	0	0	0	0	0	0	0	0	0
2019-07-14	OH_Blank43660	0	0	0	0	0	0	0	0	0	0	0	0	0	0	0	0	0	0	0	0	0	0	0	0	0	0	0	0	0	0	0	0	0	0	0	0	0	0	0	0	0	0	0	0	0	0	0	0
2019-07-14	OH_Blank43660	0	0	0	0	0	0	0	0	0	0	0	0	0	0	0	0	0	0	0	0	0	0	0	0	0	0	0	0	0	0	0	0	0	0	0	0	0	0	0	0	0	0	0	0	0	0	0	0
2019-07-12	OH_Blank43658	0	0	0	0	0	0	0	0	0	0	0	0	0	0	0	0	0	0	0	0	0	0	0	0	0	0	0	0	0	0	0	0	0	0	0	0	0	0	0	0	0	0	0	0	0	0	0	0
2019-07-12	OH_Blank43658	0	0	0	0	0	0	0.000101251	0	0	0	0	0	0	0	0	0	0	0	0	0	0	0	0	0	0	0	0	0	0	0	0	0	0	0	0	0	0	0	0	0	0	0	0	0	0	0	0	0
2019-07-12	OH_Blank43658	0	0	0	0	0	0	0	0	0	0	0	0	0	0	0	0	0	0	0	0	0	0	0	0	0	0	0	0	0	0	0	0	0	0	0	0	0	0	0	0	0	0	0	0	0	0	0	0
2019-07-11	OH_Blank43657	0	0	0	0	0	0	0.000403832	0	0	0	0	0	0	0	0	0	0	0	0	0	0	0	0	0	0	0	0	0	0	0	0	0	0	0	0	0	0	0	0	0	0	0	0	0	0	0	0	0
2019-07-11	OH_Blank43657	0	0	0	0	0	0	0.000546294	0	0	0	0	0	0	0	0	0	0	0	0	0	0	0	0	0	0	0	0	0	0	0	0	0	0	0	0	0	0	0	0	0	0	0	0	0	0	0	0	0
2019-07-11	OH_Blank43657	0	0	0	0	0	0	0.000381017	0	0	0	0	0	0	0	0	0	0	0	0	0	0	0	0	0	0	0	0	0	0	0	0	0	0	0	0	0	0	0	0	0	0	0	0	0	0	0	0	0
2019-07-11	OH_Blank43657	0	0	0	0	0	0	0.000347647	0	0	0	0	0	0	0	0	0	0	0	0	0	0	0	0	0	0	0	0	0	0	0	0	0	0	0	0	0	0	0	0	0	0	0	0	0	0	0	0	0
2019-07-10	OH_Blank43656	0	0	0	0	0	0	0	0	0	0	0	0	0	0	0	0	0	0	0	0	0	0	0	0	0	0	0	0	0	0	0	0	0	0	0	0	0	0	0	0	0	0	0	0	0	0	0	0
2019-07-10	OH_Blank43656	0	0	0	0	0	0	0	0	0	0	0	0	0	0	0	0	0	0	0	0	0	0	0	0	0	0	0	0	0	0	0	0	0	0	0	0	0	0	0	0	0	0	0	0	0	0	0	0
2019-07-10	OH_Blank43656	0	0	0	0	0	0	0	0	0	0	0	0	0	0	0	0	0	0	0	0	0	0	0	0	0	0	0	0	0	0	0	0	0	0	0	0	0	0	0	0	0	0	0	0	0	0	0	0
2019-07-09	OH_Blank43655	0	0	0	0	0	0	0.00455988	0	0	0	0	0	0	0	0	0	0	0	0	0	0	0	0	0	0	0	0	0	0	0	0	0	0	0	0	0	0	0	0	0	0	0	0	0	0	0	0	0
2019-07-09	OH_Blank43655	0	0	0	0	0	0	0.00474673	0	0	0	0	0	0	0	0	0	0	0	0	0	0	0	0	0	0	0	0	0	0	0	0	0	0	0	0	0	0	0	0	0	0	0	0	0	0	0	0	0
2019-07-09	OH_Blank43655	0	0	0	0	0	0	0.00372916	0	0	0	0	0	0	0	0	0	0	0	0	0	0	0	0	0	0	0	0	0	0	0	0	0	0	0	0	0	0	0	0	0	0	0	0	0	0	0	0	0
2019-07-09	OH_Blank43655	0	0	0	0	0	0	0.00400644	0	0	0	0	0	0	0	9.76152e-06	0	0	0	0	0	0	0	0	0	0	0	0	0	0	0	0	0	0	0	0	0	0	0	0	0	0	0	0	0	0	0	0	0
2019-07-04	OH_Blank43650	0	0	0	0	0	0	0	0	0	0	0	0	0	0	0	0	0	0	0	0	0	0	0	0	0	0	0	0	0	0	0	0	0	0	0	0	0	0	0	0	0	0	0	0	0	0	0	0
2019-07-04	OH_Blank43650	0	0	0	0	0	0	0	0	0	0	0	0	0	0	0	0	0	0	0	0	0	0	0	0	0	0	0	0	0	0	0	0	0	0	0	0	0	0	0	0	0	0	0	0	0	0	0	0
2019-07-04	OH_Blank43650	0	0	0	0	0	0	0	0.000105932	0	0	0	0	0	0	0	0	0	0	0	0	0	0	0	0	0	0	0	0	0	0	0	0	0	0	0	0	0	0	0	0	0	0	0	0	0	0	0	0
2019-07-03	OH_Blank43649	0	0	0	0	0	0	3.21726e-06	0	0	0	0	0	0	0	0	0	0	0	0	0	0	0	0	0	0	0	0	0	0	0	0	0	0	0	0	0	0	0	0	0	0	0	0	0	0	0	0	0
2019-07-03	OH_Blank43649	0	0	0	0	0	0	4.29652e-05	0	0	0	0	0	0	0	0	0	0	0	0	0	0	0	0	0	0	0	0	0	0	0	0	0	0	0	0	0	0	0	0	0	0	0	0	0	0	0	0	0
2019-07-03	OH_Blank43649	0	0	0	0	0	0	2.27151e-06	0	0	0	0	0	0	0	0	0	0	0	0	0	0	0	0	0	0	0	0	0	0	0	0	0	0	0	0	0	0	0	0	0	0	0	0	0	0	0	0	0
2019-07-02	OH_Blank43648	0	0	0	0	0	0	1.68508e-05	0	0	0	0	0	0	0	0	0	0	0	0	0	0	0	0	0	0	0	0	0	0	0	0	0	0	0	0	0	0	0	0	0	0	0	0	0	0	0	0	0
2019-07-02	OH_Blank43648	0	0	0	0	0	0	4.89847e-05	0.000102999	0	0	0	0	0	0	0	0	0	0	0	0	0	0	0	0	0	0	0	0	0	0	0	0	0	0	0	0	0	0	0	0	0	0	0	0	0	0	0	0
2019-07-02	OH_Blank43648	0	0	0	0	0	0	0.000118547	0	0	0	0	0	0	0	0	0	0	0	0	0	0	0	0	0	0	0	0	0	0	0	0	0	0	0	0	0	0	0	0	0	0	0	0	0	0	0	0	0
2019-07-02	OH_Blank43648	0	0	0	0	0	0	1.86008e-05	0	0	0	0	0	0	0	0	0	0	0	0	0	0	0	0	0	0	0	0	0	0	0	0	0	0	0	0	0	0	0	0	0	0	0	0	0	0	0	0	0
2019-07-01	OH_Blank43647	0	0	0	0	0	0	0	0	0	0	0	0	0	0	0	0	0	0	0	0	0	0	0	0	0	0	0	0	0	0	0	0	0	0	0	0	0	0	0	0	0	0	0	0	0	0	0	0
2019-07-01	OH_Blank43647	0	0	0	0	0	0	0	1.4817e-05	0	0	0	0	0	0	0	0	0	0	0	0	0	0	0	0	0	0	0	0	0	0	0	0	0	0	0	0	0	0	0	0	0	0	0	0	0	0	0	0
2019-07-01	OH_Blank43647	0	0	0	0	0	0	7.65873e-05	0	0	0	0	0	0	0	0	0	0	0	0	0	0	0	0	0	0	0	0	0	0	0	0	0	0	0	0	0	0	0	0	0	0	0	0	0	0	0	0	0
2019-07-01	OH_Blank43647	0	0	0	0	0	0	2.36214e-05	0	0	0	0	0	0	0	0	0	0	0	0	0	0	0	0	0	0	0	0	0	0	0	0	0	0	0	0	0	0	0	0	0	0	0	0	0	0	0	0	0
2019-07-01	OH_Blank43647	0	0	0	0	0	0	4.6622e-05	0	0	0	0	0	0	0	0	0	0	0	0	0	0	0	0	0	0	0	0	0	0	0	0	0	0	0	0	0	0	0	0	0	0	0	0	0	0	0	0	0
2019-06-29	OH_Blank43645	0	0	0	0	0	0	0	0	0	0	0	0	0	0	0	0	0	0	0	0	0	0	0	0	0	0	0	0	0	0	0	0	0	0	0	0	0	0	0	0	0	0	0	0	0	0	0	0
2019-06-29	OH_Blank43645	0	0	0	0	0	0	0	0	0	0	0	0	0	0	0	0	0	0	0	0	0	0	0	0	0	0	0	0	0	0	0	0	0	0	0	0	0	0	0	0	0	0	0	0	0	0	0	0
2019-06-29	OH_Blank43645	0	0	0	0	0	0	0	0	0	0	0	0	0	0	0	0	0	0	0	0	0	0	0	0	0	0	0	0	0	0	0	0	0	0	0	0	0	0	0	0	0	0	0	0	0	0	0	0
2019-06-29	OH_Blank43645	0	0	0	0	0	0	0	0	0	0	0	0	0	0	0	0	0	0	0	0	0	0	0	0	0	0	0	0	0	0	0	0	0	0	0	0	0	0	0	0	0	0	0	0	0	0	0	0
2019-06-28	OH_Blank43644	0	0	0	0	0	0	0	0	0	0	0	0	0	0	0	0	0	0	0	0	0	0	0	0	0	0	0	0	0	0	0	0	0	0	0	0	0	0	0	0	0	0	0	0	0	0	0	0
2019-06-28	OH_Blank43644	0	0	0	0	0	0	0	0	0	0	0	0	0	0	0	0	0	0	0	0	0	0	0	0	0	0	0	0	0	0	0	0	0	0	0	0	0	0	0	0	0	0	0	0	0	0	0	0
2019-06-21	OH_Blank43637	0	0	0	0	0	0	0	0	0	0	0	0	0	0	0	0	0	0	0	0	0	0	0	0	0	0	0	0	0	0	0	0	0	0	0	0	0	0	0	0	0	0	0	0	0	0	0	0
2019-06-21	OH_Blank43637	0	0	0	0	0	0	0	0	0	0	0	0	0	0	0	0	0	0	0	0	0	0	0	0	0	0	0	0	0	0	0	0	0	0	0	0	0	0	0	0	0	0	0	0	0	0	0	0
2019-06-21	OH_Blank43637	0	0	0	0	0	0	0	0	0	0	0	0	0	0	0	0	0	0	0	0	0	0	0	0	0	0	0	0	0	0	0	0	0	0	0	0	0	0	0	0	0	0	0	0	0	0	0	0
2019-06-19	OH_Blank43635	5.14545e-05	0	0	0	0	0	0	0	0	0	0	0	0	0	0	0	0	0	0	0	0	0	0	0	0	0	0	0	0	0	0	0	0	0	0	0	0	0	0	0	0	0	0	0	0	0	0	0
2019-06-19	OH_Blank43635	4.28478e-05	0	0	0	0	0	0	0	0	0	0	0	0	0	0	0	0	0	0	0	0	0	0	0	0	0	0	0	0	0	0	0	0	0	0	0	0	0	0	0	0	0	0	0	0	0	0	0
2019-06-19	OH_Blank43635	0	0	0	0	0	0	0	0	0	0	0	0	0	0	0	0	0	0	0	0	0	0	0	0	0	0	0	0	0	0	0	0	0	0	0	0	0	0	0	0	0	0	0	0	0	0	0	0
2019-06-19	OH_Blank43635	0	0	0	0	0	0	0	0	0	0	0	0	0	0	0	0	0	0	0	0	0	0	0	0	0	0	0	0	0	0	0	0	0	0	0	0	0	0	0	0	0	0	0	0	0	0	0	0
2018-10-01	PA_Blank43374	0	0	0.000130656	0	0	0	0.0265719	0	0	0	0.000296755	0	0	0	0	0	0	0	0	4.31864e-07	0	0	0	0	0	0	0	0	0	4.10351e-05	0	0	0	0	0	0	0	0	1.61067e-05	0	3.23642e-05	0	0	0	0	0	0	0.000130944
2018-10-01	PA_Blank43374	0	0	8.97364e-05	0	0	0	0	0	0	0	0.000683331	0	0	2.19786e-05	0	0	0	0	0	0	0	0	0	0	0	0	0	0	0	0	0	0	0	0	0	0	0	0	0	0	0	0	0	0	0	0	0	0.00028452
2018-10-03	PA_Blank43376	4.32781e-05	0		0	0	0	0	0	0	0	0	0	0	2.47531e-06	0	0	0	0	0	0	0	0	0	0	0	0	0	0	0	0	0	0	0	0	0	0	4.6096e-06	0	0	0	0	0	0	0	0	0	0	0
2018-10-03	PA_Blank43376	0	0	3.90843e-05	0	0	0	0	0	0	0	0	0	0	0.000343725	0	0	0	0	0	1.49648e-06	0	0	0	0	0	0	0	0	0	0	0	0	0	0	0	0	0	0	0	0	0	0	0	0	0	0	0	0
2018-10-17	PA_Blank43390	0	0	4.58036e-06	0	0	0	0	0	0	0	0.00358422	0	0	7.10117e-05	0	0	0	0	0	0	0	0	0	0	0	0	0	0	0	0	0	0	0	0	0	0	0	0	0	0	0	0	0	0	0	0	0	0
2018-10-17	PA_Blank43390	0	0	2.81755e-05	0	0	0	0	0	0	0	0.00375064	0	0	0.000116043	0	0	0	0	0	1.86051e-05	0	0	0	0	0	0	0	0	0	0	0	0	0	0	0	0	0	0	0	0	0	0	0	0	0	0	0	0
2018-10-08	PA_Blank43381	0	0	0.00012837	0	0	0	6.7973e-05	0	0	0	0.0026216	0	0	8.67476e-05	0	0	0	0	0	0	0	0	0	0	0	0	0	0	0	0	0	0	0	0	0	0	0	0	0	0	0	0	0	0	0	0	0	0
2018-10-15	PA_Blank43388	0	0	0	0	0	0	0	0	0	0	0.00180196	0	0	6.52807e-05	0	0	0	0	0	0	0	0	0	0	0	0	0	0	0	0	0	0	0	0	0	0	0	0	0	0	0	0	0	0	0	0	0	0.000730198
2018-10-09	PA_Blank43382	0	0	0	0	0	0	0	0	0	0	0	0	0	0	0	0	0	0	0	0	0	0	0	0	0	3.87974e-05	0	0	0	0	0	0	0	0	0	0	0	0	0	0	0	0	0	0	0	0	0	0
2018-10-09	PA_Blank43382	0	0	0	0	0	0	0	0	0	0	0.0031702	0	0	0	0	0	0	0	0	0	0	0	0	0	0	0	0	0	0	0	0	0	0	0	0	0	0	0	0	0	0	0	0	0	0	0	0	0
2018-10-06	PA_Blank43379	0	0	0	0	0	0	0	0	0	0	0.0034746	0	0	8.05032e-05	0	0	0	0	0	1.9642e-05	0	0	0	0	0	0	0	0	0	0	0	0	0	0	0	0	0	0	0	0	0	0	0	0	0	0	0	0
2018-10-05	PA_Blank43378	0	0	0	0	0	0	0	0	0	0	0	0	0	0	0	0	0	0	0	0	0	0	0	0	0	0	0	0	0	0	0	0	0	0	0	0	0	0	0	0	0	0	0	0	0	0	0.000141426	0
2018-10-05	PA_Blank43378	0	0	0	0	0	0	0	0	0	0	0.0031658	0	0	0.000127309	0	0	0	0	0	8.56821e-05	0	0	0	0	0	0	0	0	0	0	0	0	0	0	0	0	0	0	0	0	0	0	0	0	0	0	0	4.44592e-05
2018-09-30	PA_Blank43373	0	0	0	0	0	0	0	0	0	0	0.00257911	0	0	0	0	0	0	0	0	0	0	0	0	0	0	0	0	0	0	0	0	0	0	0	0	0	0	0	0	0	0	0	0	0	0	0	0	0
2018-09-30	PA_Blank43373	0	1.51718e-05	0	0	0	0	0	0	0	0.000685314	0.00218317	0	0	0	0	0	0	0	0	0	0	0	0	0	0	0	0	0	0	0	0	0	0	0	0	0	0	0	0	0	0	0	0	0	0	0	0	0
2018-09-30	PA_Blank43373	0	0	0	0	0	0	0	0	0	0	0.000726449	0	0	0	0	0	0	0	0	0	0	0	0	0	0	0	0	0	0	0	0	0	0	0	0	0	0	0	0	0	0	0	0	0	0	0	0	0
2018-11-15	PA_Blank43419	1.96567e-05	0	0.000230739	0	0	0	0	0	8.4289e-05	0	0	0	0	0	0	0	0	0	0	2.72096e-05	0	0	0	0.000298531	0	0	0	0	0	0.00016021	8.14286e-05	0	0	0	0	0	0	0	0	0	0	0	0	0	0	0	0	0
2018-10-31	PA_Blank43404	2.64574e-05	0	0.000546813	0	0	0	0	0	0	0	0	0	0	0	0	0	0	0	0	0	0	0	0	0	0	0	0	0	0	0	0	0	0	0	0	0	0.000205218	0	0	0	0	0	0	0	0	0	0	0
2018-10-31	PA_Blank43404	0	0	7.6314e-05	0	0	0	0.000845241	0	0	0	0	0	0	0	0	0	0	0	0	0	0	0	0	0	0	0	0	0	0	0	0	0	0	0	0	0	0	6.12118e-06	2.5562e-06	0	1.35508e-05	0	3.94113e-05	0	3.85057e-05	0	0	0.000360243
2018-10-29	PA_Blank43402	0	0	0	0	0	0	0	0	6.78341e-05	0	0	0	0	0	0	0	0	0	0	3.24186e-05	0	0	0	0	0	0	0	0	0	0	0	0	0	0	0	0	0	0	0	0	0	0	0	0	0	0	0	0
2018-10-29	PA_Blank43402	0	0	0	0	0	0	0	0	0	0	0	0.000111694	0	8.47418e-05	0	0	0	0	0	3.32343e-05	0	0	0	0	0	0	0	0	0	0	0	0	0	0	0	0	0.000111045	0	0	0	0	0	0	0	0	0	0	0
2018-10-25	PA_Blank43398	0.000110913	7.81432e-05	0.000740678	0	0	0	0.00178635	0	0	0	0	0	0	0	0	0	0	0	0	3.29503e-05	0	0	0	0	0	0	0	0	0	0	0	0	0	0	0	0	4.75501e-05	0	0	0	0	0	0	0	0	0	0	0
2018-10-24	PA_Blank43397	0	0	2.98136e-05	0	0	0	0	0	0	0	0	0	0	3.75542e-05	0	0	0	0	0	6.10679e-05	0	0	0	0	0	0	0	0	0	0	0	0	0	0	0	0	7.07591e-05	0	0	0	0	0	0	0	0	0.0016984	0	0
2018-10-14	PA_Blank43387	0	1.92999e-05	3.98151e-05	0	0	9.32382e-05	0	0	0	0	0	0	0	0	0	0	0	0	0	0	0	0	0	0	0	0	0	0	0	0	0	0	0	0	0	0	0	0	0	0	0	0	0	0	0	0	0	0
2018-10-23	PA_Blank43396	0	7.2154e-05	8.03693e-05	0	0	0	0	0	0	0	0	0	0	0	0	0	0	0	0	3.36778e-05	0	0	0	0	0	0	0	0	0	0	0	0	0	0	0	0	6.07885e-05	0	0	0	0	0	0	0	0	0	0	0
2018-10-22	PA_Blank43395	0	0	2.47146e-05	0	0	0	0	0	0	0	0.0060581	0	0	0.000101097	0	0	0	0	0	4.01305e-05	0	0	0	0	0	0	0	0	0	0	0	0	0	0	0	0	8.92885e-05	0	0	0	0	0	0	0	0	0	0	0
2018-10-21	PA_Blank43394	0	0	4.027e-05	0	0	0	0	0	0	0	0	0	0	0.000120711	0	0	0	0	0	1.62681e-06	0	0	0	0	0	0	0	0	0	0	0	0	0	0	0	0	0	0	0	0	0	0	0	0	0	0	0	0
2018-10-20	PA_Blank43393	0	0	0	0	0	0	0	0	0	0	0.000122468	0	0	0	0	0	0	0	0	0	0	0	0	0	0	0	0	0	0	0	0	0	0	0	0	0	0	0	0	0	0	0	0	0	0	0.00101468	0	0
2018-10-19	PA_Blank43392	0	0	0.000174174	0	0	0	0.00210638	0	0	0	0.00166932	0	0	4.16388e-05	0	0	0	0	0	7.22498e-05	0	0	0	0	0	0	0	0	0	0	0	0	0	0	0	0	0.000117479	0	0	0	0	0	0	0	0	0.00583531	0	0
2018-10-16	PA_Blank43389	0	2.32522e-05	0	0	0	0	0	0	0	0	0.00205337	0	0	1.25795e-05	0	0	0	0	0	0	0	0	0	0	0	0	0	0	0	0	0	0	0	0	0	0	0	0	0	0	0	0	0	0	0	0	0	0.000349398
2018-10-11	PA_Blank43384	0	0	0	0	0	0	0	0	0	0	0.00624289	0	0	0.000176258	0	0	0	0	0	0	0	0	0	0	0	0	0	0	0	0	0	0	0	0	0	0	0	0	0	0	0	0	0	0	0	0	0	0.000490411
2018-10-10	PA_Blank43383	0	0	0	0	0	0	0	0	0	0	0	0	0	0.000106262	0	0	0	0	0	0	0	0	0	0	0	0	0	0	0	0	0	0	0	0	0	0	0	0	0	0	0	0	0	0	0	0	0	0
2018-10-04	PA_Blank43377	0	0	0	0	0	0	0	0	0	0	0	0	0	0	0	0	0	0	0	0	0	0	0	0	0	0	0	0	0	0	0	0	0	0	0	0	0	0	0	0	0	0	0	0	0	0	0	0
2018-10-04	PA_Blank43377	0	0	0	0	0	0	0	0	0	0	0	0	0	0	0	0	0	0	0	0	0	0	0	0	0	0	0	0	0	0	0	0	0	0	0	0	0	0	0	0	0	0	0	0	0	0	0	0
2018-10-03	PA_Blank43376	7.18347e-05	7.06648e-05	0	0.00425561	0	0	0.00248232	0	0	0	0	0	0	2.2582e-05	0	0	0	0	0	3.30037e-05	0	0	0	0	0	0	8.19884e-05	0	0	0	0	0	0	0	0	0	0	0	0	0	0	0	0	0	0	0	0	0.000590851
2018-10-03	PA_Blank43376	0	0	0	0	0	0	0.0021492	0	0	0	0.00150318	0	0	0	0	0	0	0	0	0	0	0	0	0	0	0	0	0	0	0	0	0	0	0	0	0	0	0	0	0	0	0	0	0	0	0	0	0
2018-10-02	PA_Blank43375	0	0	0	0	0	0	0	0	0	0	0.000194911	0	0	0	0	0	0	0	0	0	0	0	0	0	0	0	0	0	0	0	0	0	0	0	0	0	0	0	0	0	0	0	0	0	0	0	0	0.000138098
2018-09-27	PA_Blank43370	0	3.1276e-05	0.00281635	0	0	0	0	0	0	0	0	0	3.09549e-05	0	0	0	0	0	0	0	0	0	0	0	0	0	0	0	0	0	0	0	0	0	0	0	0	0	0	0	0	0	0	0	0	0	0	0
2018-09-27	PA_Blank43370	0	0	0	0	0	0	0	0	0	0	0	0	0	0	0	0	0	0	0	0	0	0	0	0	0	0	0	0	0	0	0	0	0	0	0	0	0	0	0	0	0	0	0	0	0	0.000130171	0	0.000132241
2018-09-27	PA_Blank43370	0	0	0	0	0	0	0	0	0	0.00172485	0	0	3.45485e-05	0	0	0	0	0	0	0	0	0	0	0	0	0	0	0	0	0	0	0	0	0	0	0	0	4.4134e-05	0	3.86882e-05	0	0	0	0	0	0	0.000307673	0.000122404
2018-09-26	PA_Blank43369	0	0		0	0	0	0.000102235	0	0	0	0.0002406	0	0	0	0	0	0	0	0	0	0	0	0	0	0	0	0	0	0	0	0	0	0	0	0	0	0	0	0	0	0	0	0	0	0	0	0	0.000407279
2018-09-26	PA_Blank43369	0	0	4.93257e-05	0	0	0	0.000877047	0	0	0	0	0	0	0	0	0	0	0	0	0	0	0	0	0	0	0	0	0	0	0	0	0	0	0	0	0	0	0	0	0	0	0	0	0	0	0	0	0.000475574
[truncated: 2 more columns]
