# Supplementary material for: Domestic groundwater wells in Appalachia show evidence of low-dose, complex mixtures of legacy pollutants
Source: Royal Society of Chemistry journal article supplement (doi:10.1039/d4em00364k), 2024-01-01
Supplement: d4em00364k2.pdf [file d4em00364k2.pdf]

1 **Domestic groundwater wells in Appalachia show evidence of low-dose, complex mixtures of**  
2 **legacy pollutants**

3 Nicolette A. Bugher<sup>1</sup>, Boya Xiong<sup>1,4</sup>, Runako I. Gentles<sup>1</sup>, Lukas D. Glist<sup>1</sup>, Helen G. Siegel<sup>2</sup>,  
4 Nicholas P. Johnson<sup>3</sup>, Cassandra J. Clark<sup>3</sup>, Nicole C. Deziel<sup>3</sup>, James E. Saiers<sup>2</sup>, Desiree L. Plata<sup>1</sup>

5

6 <sup>1</sup>Massachusetts Institute of Technology, Department of Civil and Environmental Engineering,  
7 Parsons Laboratory, 15 Vassar Street, Cambridge Massachusetts 02139 USA

8 <sup>2</sup>Yale School of the Environment, Environmental Science Center, 21 Sachem Street, New Haven,  
9 Connecticut 06511, USA

10 <sup>3</sup>Yale School of Public Health, Department of Environmental Health Sciences, 60 College St.,  
11 New Haven, Connecticut 06510

12 <sup>4</sup>University of Minnesota, Department of Civil, Environmental, and Geo-Engineering, 500  
13 Pillsbury Drive S.E., Minneapolis, MN 55455

14

15 **Supplemental Information**

16

17 **Table S1:** VOC compound index, limit of detection (LOD), and applicable maximum  
18 contamination levels (MCLs). *Note:* reported detection limits were established from the average  
19 of daily individual LODs.

| Index | Compound                                                | LOD<br>(ug/L)      | EPA MCL<br>(ug/L) |
|-------|---------------------------------------------------------|--------------------|-------------------|
| 1     | chloromethane                                           | $4 \times 10^{-3}$ | -                 |
| 2     | vinyl chloride                                          | $4 \times 10^{-5}$ | 0.002             |
| 3     | bromomethane                                            | $1 \times 10^{-3}$ | -                 |
| 4     | chloroethane                                            | $3 \times 10^{-3}$ | -                 |
| 5     | trichlorofluoromethane                                  | $2 \times 10^{-3}$ | -                 |
| 6     | 1,1 dichloroethylene and trans-1,2-<br>dichloroethylene | $3 \times 10^{-3}$ | 0.007 and 0.1     |
| 7     | 1,1-dichloroethane                                      | $1 \times 10^{-2}$ | -                 |
| 8     | 2,2 dichloropropane and cis-1,2-<br>dichloroethylene    | $2 \times 10^{-3}$ | 0.07              |
| 9     | bromochloromethane                                      | $2 \times 10^{-2}$ | -                 |
| 10    | chloroform                                              | $6 \times 10^{-3}$ | 0.08 <sup>a</sup> |
| 11    | 1,1,1-trichloroethane                                   | $1 \times 10^{-2}$ | 0.2               |
| 12    | 1,1-dichloropropene and carbon tetrachloride            | $2 \times 10^{-2}$ | 0.005             |

|    |                                               |                    |                                       |
|----|-----------------------------------------------|--------------------|---------------------------------------|
| 13 | 1, 2-dichloroethane and benzene               | $4 \times 10^{-4}$ | 0.005 and 0.005                       |
| 14 | trichloroethene                               | $8 \times 10^{-3}$ | 0.005                                 |
| 15 | 1,2-dichloropropane                           | $2 \times 10^{-3}$ | 0.005                                 |
| 16 | dibromomethane                                | $6 \times 10^{-3}$ | -                                     |
| 17 | bromodichloromethane                          | $2 \times 10^{-2}$ | 0.08 <sup>a</sup>                     |
| 18 | cis-1,3-dichloropropene                       | $1 \times 10^0$    | -                                     |
| 19 | toluene                                       | $1 \times 10^{-4}$ | 1                                     |
| 20 | trans-1,3-dichloropropene                     | $5 \times 10^{-3}$ | -                                     |
| 21 | 1,1,2-trichloroethane                         | $8 \times 10^{-2}$ | 0.005                                 |
| 22 | 1,3-dichloropropane                           | $7 \times 10^{-3}$ | -                                     |
| 23 | tetrachloroethene                             | $1 \times 10^{-2}$ | 0.005                                 |
| 24 | dibromochloromethane                          | $6 \times 10^{-2}$ | 0.08 <sup>a</sup>                     |
| 25 | 1,2-dibromoethane (EDB)                       | $5 \times 10^{-2}$ | -                                     |
| 26 | chlorobenzene                                 | $1 \times 10^{-3}$ | 0.1                                   |
| 27 | 1,1,1,2-tetrachloroethane                     | $6 \times 10^{-3}$ | -                                     |
| 28 | ethylbenzene                                  | $2 \times 10^{-3}$ | 0.7                                   |
| 29 | m-xylene and p-xylene                         | $1 \times 10^{-3}$ | 10 <sup>b</sup>                       |
| 30 | o-xylene, styrene, bromoform                  | $2 \times 10^{-3}$ | 10 <sup>b</sup> and 0.08 <sup>a</sup> |
| 31 | 1,1,2,2-tetrachloroethane                     | $9 \times 10^{-2}$ | -                                     |
| 32 | isopropylbenzene (cumene) and n-propylbenzene | $6 \times 10^{-3}$ | -                                     |
| 33 | bromobenzene                                  | $9 \times 10^{-3}$ | -                                     |
| 34 | 1,2,3-trichloropropane                        | $4 \times 10^{-2}$ | -                                     |
| 35 | 1,3,5-trimethylbenzene                        | $8 \times 10^{-3}$ | -                                     |
| 36 | 2-chlorotoluene                               | $5 \times 10^{-2}$ | -                                     |
| 37 | 4-chlorotoluene                               | $2 \times 10^{-3}$ | -                                     |
| 38 | tert-butylbenzene                             | $4 \times 10^{-3}$ | -                                     |
| 39 | 1,2,4-trimethylbenzene                        | $5 \times 10^{-3}$ | -                                     |
| 40 | sec-butylbenzene                              | $5 \times 10^{-2}$ | -                                     |
| 41 | 1,3-dichlorobenzene                           | $5 \times 10^{-2}$ | -                                     |
| 42 | p-isopropyltoluene (p-cymene)                 | $1 \times 10^{-2}$ | -                                     |
| 43 | 1,4-dichlorobenzene                           | $4 \times 10^{-3}$ | 0.075                                 |
| 44 | n-butylbenzene and 1,2-dichlorobenzene        | $4 \times 10^{-4}$ | N/A and 0.6                           |
| 45 | 1,2-dibromo-3-chloropropane                   | $1 \times 10^{-1}$ | 0.0002                                |
| 46 | 1,2,4-trichlorobenzene                        | $9 \times 10^{-2}$ | 0.07                                  |
| 47 | hexachlorobutadiene                           | $2 \times 10^{-2}$ | -                                     |
| 48 | naphthalene                                   | $9 \times 10^{-3}$ | -                                     |
| 49 | 1,2,3-trichlorobenzene                        | $1 \times 10^{-2}$ | -                                     |
| 50 | methylene chloride (dichloromethane)          | $5 \times 10^{-3}$ | 0.005                                 |

20 <sup>a</sup>MCL for Total Trihalomethanes (sum of 4). <sup>b</sup>MCL for xylenes (Total).

21

22

23 **Quality Assurance and Quality Control** Assessment of study quality involved interrogation of  
24 blank control samples (i.e., field blanks and laboratory blanks) to assess potential procedural or  
25 analytical contamination. VOC detection frequencies were less than 10% for all compounds  
26 except dichloromethane in laboratory blanks (46%), which was interrogated further for potential  
27 laboratory contamination bias. VOCs were detected above limits of detection (**SI Table 1**) in  
28 field blanks in less than 10% of samples for all but five compounds (chloromethane; 16%, vinyl  
29 chloride; 14%, bromomethane; 15%, dichloromethane; 53%, bromochloromethane; 29%) (**SI**  
30 **Appendix I Data file**). Field blank analyte concentrations were not normally distributed. Thus,  
31 to investigate bias, non-parametric distribution-free statistical analyses were conducted for each  
32 of the designated VOCs as outlined in Hahn and Meeker (1991) utilizing ranked sample  
33 concentrations and binomial probability to determine an upper confidence limit (UCL) on VOCs  
34 with a high frequency and magnitude of field blank detections. This blank UCL allows for  
35 inference on potential contamination in the population of environmental samples; i.e., the 90<sup>th</sup>-  
36 percentile concentration of blank samples for those with frequent VOC detections is the  
37 anticipated maximum contamination based on USGS quality assurance for VOCs (Bender et al.,  
38 2011). Dichloromethane UCL calculated LOD was 8.13 ug/L, which far exceeded the  
39 analytically determined LOD of 0.005 ug/L. This level was similar to the DCM concentration  
40 distribution in environmental samples, and routinely appeared in laboratory blanks. Thus,  
41 contamination bias was *not* disproven, and dichloromethane was removed from the analysis  
42 accordingly. Vinyl chloride (OH and WV UCL adjusted LOD: 0.06 ug/L), chloromethane (WV  
43 UCL adjusted LOD: 0.08 ug/L), bromomethane (OH UCL adjusted LOD: 0.1 ug/L) and  
44 bromochloromethane (OH and WV UCL adjusted LOD: 0.4 ug/L) were not detected in  
45 laboratory blanks and considered free of laboratory contamination. Accordingly, we included  
46 vinyl chloride, chloromethane, bromomethane and bromochloromethane detections at reported  
47 LODs (**SI Table 1**) to accurately reflect concentrations in the water, as laboratory blanks were  
48 free of contamination.

49

50

51

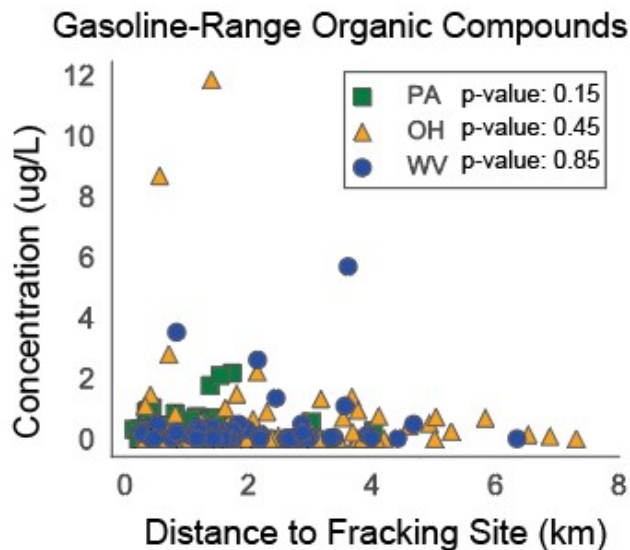

52

53 **Figure SI 1:** Correlation analyses of distance to hydraulic fracturing well and gasoline-range  
 54 organic compound concentrations (ug/L) for samples taken in West Virginia, Ohio and  
 55 Pennsylvania.

56

57 **Gasoline- and Diesel Range Organic Compounds as Mixture Screening Tools.** As a non-  
 58 specific measure of total very volatile organic compound exposure, this study measured gasoline  
 59 range organic compound concentrations (sum of compounds eluting between characteristic  
 60 compounds C6 to C10) for each sample. Low levels of GRO concentrations were detected in  
 61 samples from Ohio and West Virginia,  $0.04 \pm 0.05$  to  $11.8 \pm 0.2$  ug/L and  $0.01 \pm 0.01$  to  $5.6 \pm 0.8$   
 62 ug/L, respectively. (Note that PA GRO levels from this sampling effort were  $0.13 \pm 0.06$  to  $2.2 \pm$   
 63  $0.7$  ug/L, as reported in Xiong et al. 2022<sup>1</sup>). GRO concentrations were not correlated with distance  
 64 to closest hydraulic fracturing well (Spearman's Correlation; p-value > 0.05) (**Figure SI 1**). GRO  
 65 compound measurements are integrated measures to capture mixture tendencies and occurrences  
 66 in water samples. Samples with high GRO compound concentrations can be interrogated to  
 67 determine specific chemical constituents. Here, we see GRO compound concentrations linearly  
 68 correlated ( $R^2 = 0.83$ ) to the sum of total VOC (tVOC) concentrations in this study (n = 50). GRO  
 69 compound concentrations had no linear relationship ( $R^2 = 0.172$ ) to number of chemicals detected  
 70 per sample site in our target analysis. Since chemical mixture risk assessments rely on both  
 71 concentration of individual mixture components and number of components in a given sample,  
 72 both total VOC detections and individual concentrations play a vital role. This study is limited  
 73 based on the semi-target analysis of only 59 potential VOCs detected in HDHF activities and non-  
 74 target assessments characterizing all GRO VOC components would strengthen mixture risk  
 75 assessments.

76

77

78

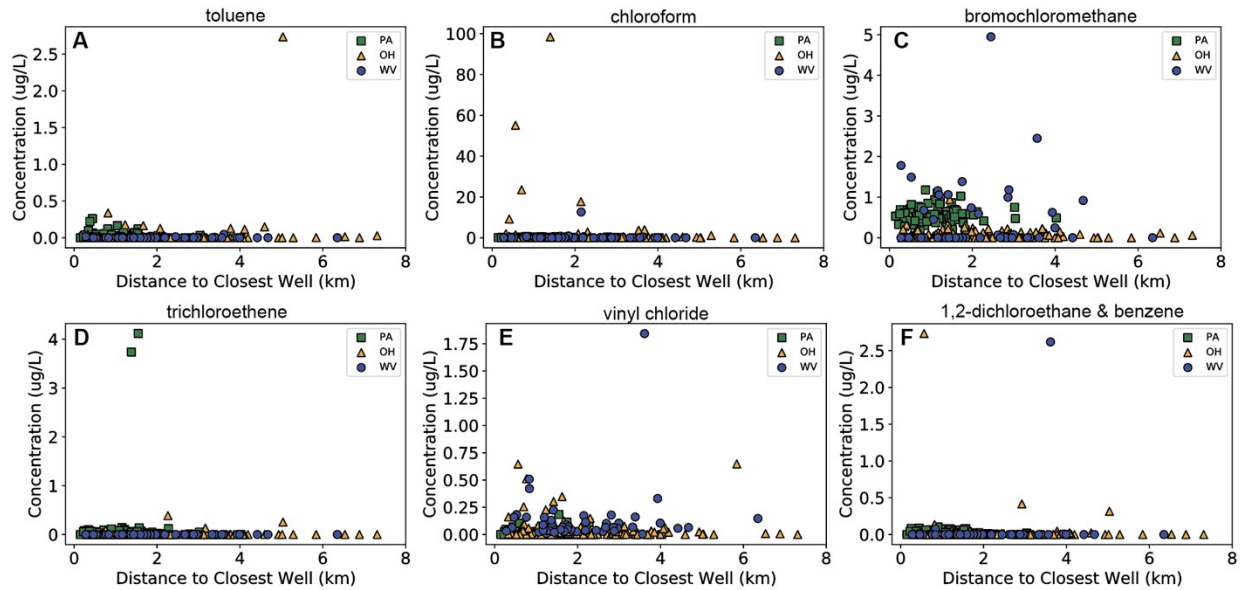

79  
80  
81  
82  
83  
84  
85

**Figure SI 2)** Distance to hydraulic fracturing well and concentrations of commonly occurring VOCs: (a) toluene, (b) chloroform, (c) bromochloromethane, (d) trichloroethene, (e) vinyl chloride, and (f) the sum of 1,2-dichloroethane & benzene).

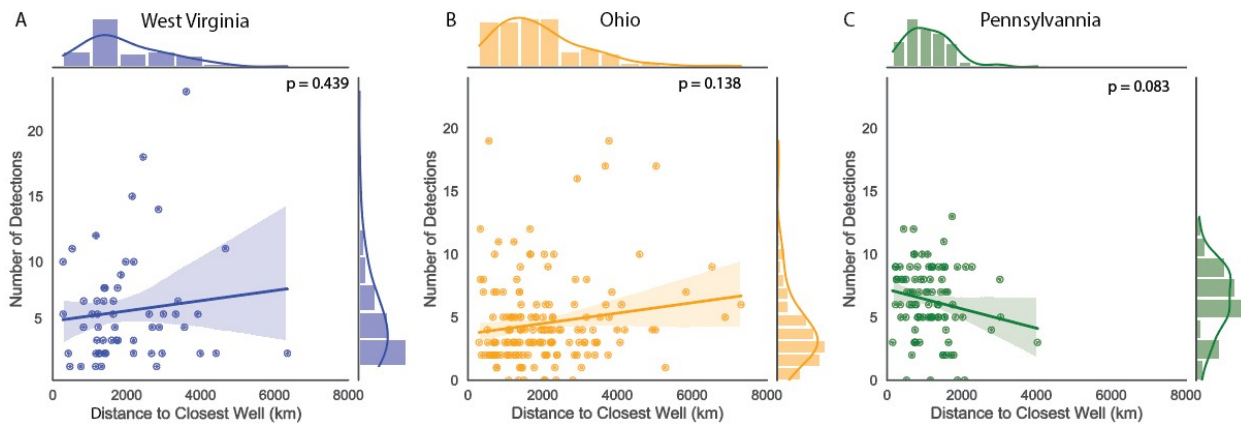

86

**Figure SI 3)** Distance to hydraulic fracturing well and number of VOC detections per sampling site. The linear distance between the sample site location and nearest hydraulic fracturing well for (a) West Virginia (histogram range: < 300m to 6.4 km); (b) Ohio (histogram range: < 300 to 7.4 km), and (c) Pennsylvania (histogram range: < 200m to 4.2km) are shown in the histograms above each figure against distribution of number of detections for each state.

92 Spearman correlation coefficients (p-values between 0.72 and 0.95) indicate no significant linear  
93 relationship between distance to closest hydraulic fracturing well site and individual VOC  
94 concentrations (**Figure SI2**). In Pennsylvania, concentrations of TCE in wells within 10 km had a  
95 weak negative correlation ( $r^2 = 0.53$ ; p-value < 0.05, Spearman Correlation) with distance to closest  
96 well, but were not significantly elevated (p-value > 0.05, Mann Whitney U) compared to  
97 concentrations in wells more than 10 km away. The many potential sources of TCE in groundwater

98 may obfuscate pathways from specific contamination site. Ohio and West Virginia showed no  
99 significant linear relationships between distance and individual VOCs concentrations.  
100 Additionally, total VOC concentrations ( $\text{VOC}_{\text{TOT}}$ ; data not shown) and number of VOC detections  
101 (**Figure SI3**) were not significantly correlated in all three states (Spearman Rank Order  
102 Correlation;  $r^2$  between 0.16 and 0.52; p-value > 0.05), suggesting limited applicability of  
103 frequency of detections of tVOCs for use as a measure of “human impact” as seen in previous  
104 studies<sup>2</sup>. Nevertheless, the variation in detection frequency of singular VOCs between states  
105 provides evidence of local variation in water composition between sampling areas.

106

107

108 References

109

- 110 1. Xiong, B., Soriano, M. A., Gutchess, K. M., Hoffman, N., Clark, C. J., Siegel, H. G., Andrew,  
111 G., de Vera, D., Li, Y., Brenneis, R. J., Cox, A. J., Ryan, E. C., Sumner, A. J., Deziel, N. C.,  
112 Saiers, J. E., & Plata, D. L. (2022). Groundwaters in Northeastern Pennsylvania near intense  
113 hydraulic fracturing activities exhibit few organic chemical impacts †. *Environmental Science*  
114 *and Technology*, <https://doi.org/10.1039/d1em00124h>
- 115 2. Deeds, D. A., Kulongoski, J. T., & Belitz, K. (2012). Assessing California Groundwater  
116 Susceptibility Using Trace Concentrations of Halogenated Volatile Organic Compounds.  
117 *Environmental Science and Technology*. <https://doi.org/10.1021/es303546b>
- 118 3. Hahn, G.J. and Meeker, W.Q. (1991) *Statistical Intervals: A Guide for Practitioners*, John Wiley &  
119 Sons, New York. <http://dx.doi.org/10.1002/9780470316771>
- 120 4. Bender, D.A., Zogorski, J.S., Mueller, D.K., Rose, D.L., Martin, J.D., and Brenner, C.K., (2011)  
121 Quality of volatile organic compound data from groundwater and surface water for the National  
122 Water-Quality Assessment Program, October 1996–December 2008: U.S. Geological Survey  
123 Scientific Investigations Report 2011–5204, 128 p.

124
