# Supplementary figures and images for: Domestic groundwater wells in Appalachia show evidence of low-dose, complex mixtures of legacy pollutants
Source: Royal Society of Chemistry journal article supplement (doi:10.1039/d4em00364k), 2024-01-01

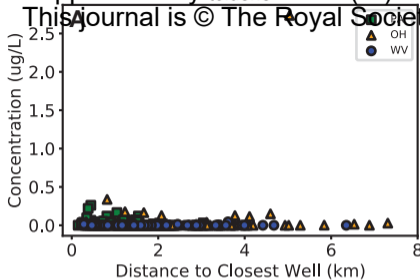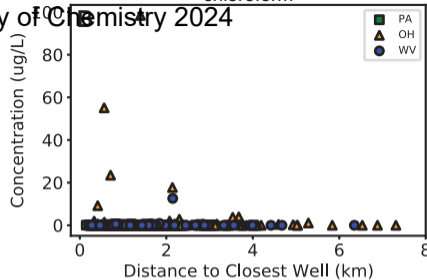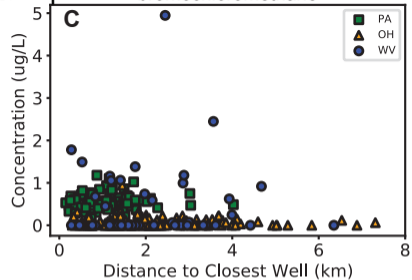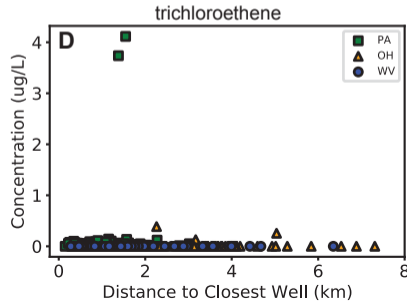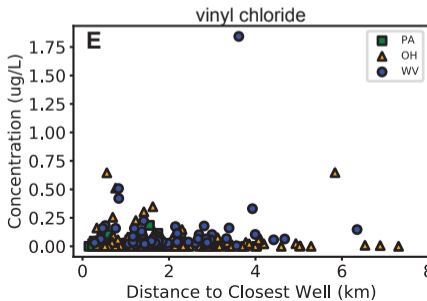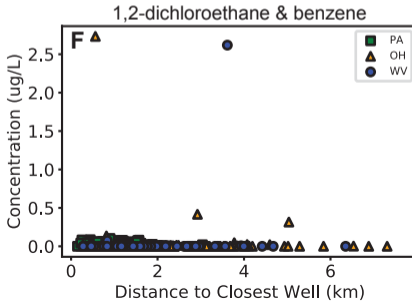

Supplement: d4em00364k3.pdf [file d4em00364k3.pdf]

Detection Count

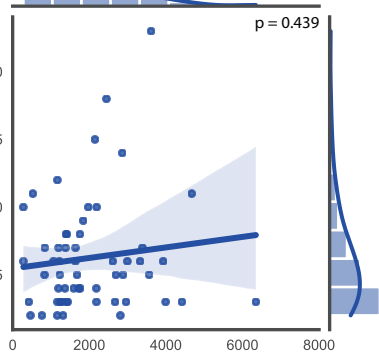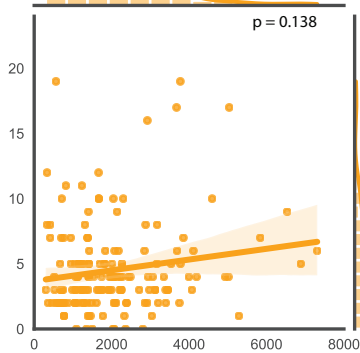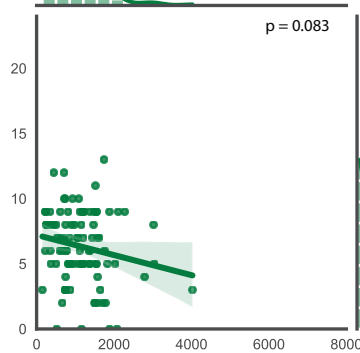

Distance to Closest Fracking Site (m)

Supplement: d4em00364k4.pdf [file d4em00364k4.pdf]
